# Supplementary material for: The eye response test alone is sufficient to predict stroke outcome—reintroduction of Japan Coma Scale: a cohort study
Source: PubMed Central journal article supplement — BMJ Open. 2013 Apr 29;3(4):e002736. doi: 10.1136/bmjopen-2013-002736 (PMC3641437; doi:10.1136/bmjopen-2013-002736), 2013-04-29
Supplement: bmjopen-2013-002736.draft_revisions.pdf [file bmjopen-2013-002736.draft_revisions.pdf]

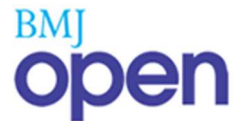

**A simple coma scale predicts stroke outcome  
Re-introduction of the Japan Coma Scale**

|                                 |                                                                                                                                                                                                                                                                                                                                                                                                                                                                                                                                                                                                                                                                                                                 |
|---------------------------------|-----------------------------------------------------------------------------------------------------------------------------------------------------------------------------------------------------------------------------------------------------------------------------------------------------------------------------------------------------------------------------------------------------------------------------------------------------------------------------------------------------------------------------------------------------------------------------------------------------------------------------------------------------------------------------------------------------------------|
| Journal:                        | <i>BMJ Open</i>                                                                                                                                                                                                                                                                                                                                                                                                                                                                                                                                                                                                                                                                                                 |
| Manuscript ID:                  | bmjopen-2013-002736                                                                                                                                                                                                                                                                                                                                                                                                                                                                                                                                                                                                                                                                                             |
| Article Type:                   | Research                                                                                                                                                                                                                                                                                                                                                                                                                                                                                                                                                                                                                                                                                                        |
| Date Submitted by the Author:   | 16-Feb-2013                                                                                                                                                                                                                                                                                                                                                                                                                                                                                                                                                                                                                                                                                                     |
| Complete List of Authors:       | Shigematsu, Kazuo; National Hospital Organization, Minami Kyoto Hospital, Neurology<br>Nakano, Hiromi; Kyoto Kidugawa Hospital, Neurosurgery<br>Watanabe, Yoshiyuki; Kyoto Prefectural University of Medicine, Graduate School of Medical Science, Epidemiology for Community Health and Medicine<br>Sekimoto, Tatsuyuki; Kyoto Prefectural Yosanoumi Hospital, Neurosurgery<br>Shimizu, Kouichiro; Kyoto Fushimi Shimizu Hospital, Neurology<br>Nishizawa, Akihiko; The Nishizawa Clinic, Internal Medicine<br>Okumura, Atsushi; Jujyo Rehabilitation Hospital, Neurosurgery<br>Makino, Masahiro; Kyoto Prefectural University of Medicine, Neurology;<br>Bando, Kazuhiko; The Bando Clinic, Internal Medicine |
| <b>Primary Subject Heading</b>: | Emergency medicine                                                                                                                                                                                                                                                                                                                                                                                                                                                                                                                                                                                                                                                                                              |
| Secondary Subject Heading:      | Epidemiology, Neurology                                                                                                                                                                                                                                                                                                                                                                                                                                                                                                                                                                                                                                                                                         |
| Keywords:                       | Stroke < NEUROLOGY, Neurology < INTERNAL MEDICINE, Stroke medicine < INTERNAL MEDICINE                                                                                                                                                                                                                                                                                                                                                                                                                                                                                                                                                                                                                          |
|                                 |                                                                                                                                                                                                                                                                                                                                                                                                                                                                                                                                                                                                                                                                                                                 |

SCHOLARONE™  
Manuscripts

1  
2  
3  
4  
5 **A simple coma scale predicts stroke outcome**  
6 **Re-introduction of Japan Coma Scale**  
7

8  
9  
10 **Short title: The Japan Coma Scale predicts stroke outcome**  
11

12 Kazuo Shigematsu<sup>1</sup>, Hiromi Nakano<sup>2</sup>, Yoshiyuki Watanabe<sup>3</sup>, Tatsuyuki Sekimoto<sup>4</sup>,  
13 Kouichiro Shimizu<sup>5</sup>, Akihiko Nishizawa<sup>6</sup>, Atsushi Okumura<sup>7</sup>, Masahiro Makino<sup>8</sup>,  
14 Kazuhiko Bando<sup>9</sup>  
15  
16

17  
18 <sup>1</sup>Department of Neurology, National Hospital Organization, Minami Kyoto Hospital,  
19 Kyoto, Japan  
20

21 <sup>2</sup>Department of Neurosurgery, Kyoto Kidugawa Hospital, Kyoto, Japan  
22

23 <sup>3</sup>Department of Epidemiology for Community Health and Medicine, Kyoto Prefectural  
24 University of Medicine, Graduate School of Medical Science, Kyoto, Japan  
25

26 <sup>4</sup>Department of Neurosurgery, Kyoto Prefectural Yosanoumi Hospital, Kyoto, Japan  
27

28 <sup>5</sup>Department of Neurosurgery, Kyoto Fushimi Shimizu Hospital, Kyoto, Japan  
29

30 <sup>6</sup>Department of Internal Medicine, The Nishizawa Clinic, Kyoto, Japan  
31

32 <sup>7</sup>Department of Neurosurgery, Jujyo Rehabilitation Hospital, Kyoto, Japan  
33

34 <sup>8</sup>Department of Neurology, Japanese Red Cross Kyoto Daini Hospital, Kyoto, Japan  
35

36 <sup>9</sup>Department of Internal Medicine, The Bando Clinic, Kyoto, Japan  
37

38 Correspondence to Kazuo Shigematsu  
39

40 Department of Neurology, the National Hospital Organization, Minami Kyoto Hospital  
41

42 11 Nakaashihara, Jyo, Kyoto, Japan, 610-0113  
43

44 Phone 81-774-52-0065, Fax 81-75-821-9610, E-mail: neuron@k07.gmail.com]  
45

46 **Key Words:** scales; coma; consciousness; stroke  
47

48 Contributorship: All authors contributed equally in the data collection and analysis. KS  
49 wrote the manuscript. All authors read and approved the final manuscript.  
50

51 Conflicts of Interest: None  
52

53 Funding: None  
54  
55  
56  
57  
58  
59  
60

## Abstract

### Objective

Prompt assessment of consciousness level is vitally important during the emergency care of stroke patients. Requirements for a better scale include simplicity, reliability, applicability and predictability for outcome. The Japan Coma Scale (JCS) is a one-axis coma scale published in 1974 with outstanding simplicity. The hypothesis is that the JCS is sufficient to predict the stroke outcome. The aim of the study is to verify the predictability of the JCS, which should help the JCS attain international recognition.

### Methods

We investigated the relationship between consciousness level based on the JCS at the stroke onset and activities of daily living (ADL) at 30 days or deaths within 30 days in a large population-based stroke registry. We calculated Spearman's correlation coefficients for the correlation between the JCS and ADL scale, generated estimated survival curves by the Kaplan-Meier method and finally compared hazard ratios for

1  
2  
3  
4  
5  
6 death within 30 days after onset, comparing patients with different conscious levels  
7  
8  
9 based on the JCS.

## 10 11 12 13 14 **Results**

15  
16  
17  
18  
19  
20 A total of 13,788 (97.2%) patients were graded based on the JCS. The JCS correlated to  
21  
22  
23 ADL scores with a Spearman's correlation coefficient of 0.61. Hazard ratios for death  
24  
25  
26 within 30 days were 1 (reference), 5.55, 9.54 and 35.21 in those scored as JCS0, JCS1,  
27  
28  
29 JCS2 and JCS3, respectively.  
30  
31  
32  
33  
34

## 35 **Conclusions**

36  
37  
38  
39  
40 Using a single test of eye response, the JCS has outstanding merits as a coma scale: i.e.  
41  
42  
43 simplicity and applicability. The present study adds predictability for the early outcome  
44  
45  
46 in stroke patients. The JCS is valuable especially at an emergency setting when a  
47  
48  
49 prompt assessment of consciousness level is needed.  
50  
51  
52  
53  
54  
55  
56  
57  
58  
59  
60

## Article summary

### *Article focus*

The Japan Coma Scale (JCS) is a one-axis coma scale published in 1974. It is so simple and easy to use that it has been established as a standard coma scale in Japan.

Nevertheless, it has little recognition internationally. The aim of the study is to confirm its predictability in stroke patients. We hope the JCS will contribute to the medical profession and especially to the emergency medical-care.

### *Key messages*

Using a single test of eye response, the JCS has outstanding merits as a coma scale: i.e. simplicity and applicability. The present study adds predictability for the early outcome in stroke patients. The JCS is valuable especially at an emergency setting when a prompt assessment of consciousness level is needed.

### *Strengths and limitations of this study*

Strengths: the study is based on a large stroke registry and the JCS has been used widely in Japan.

Limitations: there are few studies on the JCS and on the ADL scale in scientific international journals yet.

## Introduction

Prompt assessment of consciousness levels is vitally important during the emergency care of stroke patients. There is no current perfect coma scale, and requirements for a better scale include:

- 1) Simplicity: ease of assessment, ease of recording, ease of sharing with medical and co-medical staff.
- 2) Reliability: consistency among assessors.
- 3) Applicability: for any patient in any setting.
- 4) Predictability for the outcome.

The Japan Coma Scale (JCS) has become widely used in Japan since it was first published in 1974<sup>1-3</sup>. An outstanding feature of the JCS is its simplicity, which has prompted both pre-hospital personnel and in-hospital staff to use the scale. The JCS enables prompt communication among emergency service staff and hospital staff and among nurses and physicians. However, the JCS's predictability of the outcome has not been clarified to date. The lack of evidence of its predictability may have prevented the JCS from attaining international recognition.

1  
2  
3  
4  
5  
6 Our hypothesis is that consciousness levels categorized by the JCS should correlate with  
7  
8  
9 the severity of stroke and therefore should predict outcome of stroke. If the  
10  
11  
12 predictability of the JCS is demonstrated, it should be re-appraised as a prompt coma  
13  
14  
15 scale. Although we have the Glasgow Coma Scale (GCS), which was also published in  
16  
17  
18 1974<sup>4,5</sup>, it would be more pragmatic to have a simpler coma scale especially in an  
19  
20  
21 emergency. The major difference between the GCS and the JCS is that the former is a  
22  
23  
24 three-axis scale whereas the latter is a one-axis scale.

25  
26 The aim of the study is to show that the JSC predicts early outcome, including the level  
27  
28  
29 of activity of daily life (ADL) and the hazard ratios for death, and, subsequently, to  
30  
31  
32 re-introduce this simple coma scale to the world.  
33  
34  
35  
36  
37

### 38 **Materials and Methods**

39  
40  
41  
42  
43  
44 We studied the relationship between the outcome at 30 days after stroke and the  
45  
46  
47 consciousness levels based on the JCS at the onset of neurological impairment. We  
48  
49  
50 analyzed all new stroke patients identified from January 1999 to December 2009  
51  
52  
53 inclusive in the entire Kyoto prefecture and registered in the Kyoto Stroke Registry  
54  
55  
56 (KSR)<sup>6</sup>. Detailed information on the KSR has been described previously (Shigematsu  
57  
58  
59  
60

1  
2  
3  
4  
5  
6 et al. BMJ Open, in press). The diagnosis of stroke was confirmed by local neurologists  
7  
8  
9 and/or neurosurgeons according to the WHO definition <sup>7</sup>. We categorized the patients  
10  
11 into cerebral infarction (CI), cerebral hemorrhage (CH), subarachnoid hemorrhage  
12  
13 (SAH) and others, based on the neurological findings, laboratory data, and findings of  
14  
15 CT, MRI and angiography.  
16  
17  
18  
19

20  
21  
22  
23 We used the following definitions.  
24

25  
26 1) Consciousness levels based on the JCS encompassed four levels:  
27

- 28  
29 1 JCS 0 (alert)
- 30  
31 2 JCS 1 (not fully alert but awake without any stimuli)
- 32  
33 3 JCS 2 (arousable with stimulation)
- 34  
35 4 JCS 3 (unarousable)

36  
37  
38  
39  
40 2) ADL scale at 30 days after stroke onset included five levels:  
41

- 42  
43 1 ADL1 (No symptoms or no significant disability. Able to carry out all usual  
44  
45 activities without help. Able to walk without a mobility aide)
- 46  
47 2 ADL2 (mildly disabled, or utilization of mobility aide. Unable to carry out all  
48  
49 usual activities without help. Unable to walk without mobility aide.)
- 50  
51 3 ADL3 (moderately disabled, or wheelchair-bound condition. Unable to walk  
52  
53  
54  
55  
56  
57  
58  
59  
60



1  
2  
3  
4  
5  
6 without assistance.)  
7

8  
9 4 ADL4 (severely disabled, or bed-bound condition. Unable to use wheel chairs  
10  
11 without help.)  
12

13  
14 5 ADL5 (Dead)  
15  
16  
17  
18  
19

### 20 21 ***Ethics Statement*** 22

23  
24  
25  
26 This research was performed in accordance with the ethical principles for medical  
27  
28 research involving human subjects outlined in the Declaration of Helsinki. This research  
29  
30 was approved by the Board of Directors, the Kyoto Medical Association, the  
31  
32 Department of Health and Welfare, Kyoto Prefecture and Ethics Committee of the  
33  
34 National Hospital Organization, Minami Kyoto Hospital. Since all identifying personal  
35  
36 information was stripped from the secondary files before analysis, the boards waived  
37  
38 the requirement for written informed consent from the patients involved.  
39  
40  
41  
42  
43  
44  
45  
46

### 47 ***Statistical Analyses*** 48

49  
50 The frequencies of characteristics among the four conscious levels were determined and  
51  
52 evaluated for univariate associations by Chi-square analysis. Numerical data such as age  
53  
54 and blood pressure were compared with Student-t test. Spearman's rank correlation  
55  
56  
57  
58  
59  
60

1  
2  
3  
4  
5  
6 coefficients were used to identify the correlation between the JCS and ADL scale. We  
7  
8  
9 used the Kaplan-Meier method for curves of estimated survival, a log-rank test for  
10  
11  
12 comparisons of estimated survival among the JCS categories, and Cox proportional  
13  
14  
15 hazards regression for hazard ratios for death. Adjustments for age, sex, systolic and  
16  
17  
18 diastolic blood pressures, histories of hypertension, arrhythmia and diabetes mellitus,  
19  
20  
21 stroke type and paresis were also utilized. Analyses were performed using SPSS ver.19.  
22  
23  
24 All reported p values are 2-sided.  
25  
26  
27  
28

## 29 **Results**

30  
31  
32  
33  
34  
35 The characteristics of patients are summarized in Table 1. Data on age, and sex were  
36  
37  
38 complete in all patients in the study cohort. The other characteristics had missing data in  
39  
40  
41 a few patients. The numbers of patients examined are shown in the tables.  
42

43  
44 We evaluated the consciousness levels of 13,406 patients out of 13,788 (97.2%), based  
45  
46  
47 on the JCS. JCS data were missing for 382 patients (2.8%). Among the 13,406 patients,  
48  
49  
50 the number and percentage per group were as follows: JCS0 (7,676 [55.7%]), JCS1  
51  
52 (2,619 [9.0%]), JCS2 (1,602 [11.6%]) and JCS3 (1,509 [10.9%]), respectively. We  
53  
54  
55 evaluated the ADL scale in 12,601 (91.4%) patients at 30 days after the onset of  
56  
57  
58  
59  
60

1  
2  
3  
4  
5  
6 neurological impairment. We obtained data on both the JCS and the ADL scale in  
7  
8  
9 12,277 (89.0%) of the stroke patients (Table 2).

10  
11 The Spearman's correlation coefficient was 0.608 for the correlation between the JCS  
12  
13 and ADL scale ( $p < 0.001$ ). Kaplan-Meier Survival curves of patients in each JCS  
14  
15 category are presented (Figure 1). A log-rank test proved the differences were  
16  
17 significant ( $p < 0.001$ ). For Kaplan-Meier Survival curves in each JCS category in each  
18  
19 stroke subtype, see supplementary figures (Figure 1A, 1B and 1C).

20  
21 Hazard ratios for death, comparing JCS categories and their 95% confidential intervals,  
22  
23 are summarized in Table 3.  
24  
25

## 26 27 28 29 30 31 32 33 34 35 **Discussion**

36  
37  
38  
39  
40 The JCS principally focuses on eye responses. Being a single test, the JCS has  
41  
42 outstanding merits as a coma scale: i.e. simplicity and applicability, which should  
43  
44 minimize interpreter errors. Simplicity is very important in communication among  
45  
46 physicians, nurses and paramedics, especially in emergency settings. The present study  
47  
48 adds to its virtues the predictability for early outcome in stroke patients.  
49  
50

51  
52  
53  
54  
55 In summary, the advantages of the JCS include four points:  
56  
57  
58  
59  
60

1  
2  
3  
4  
5  
6 1) Predictability for stroke outcome.  
7

8  
9 This study showed the predictability of the JCS for the stroke outcome.

10  
11 The JCS correlated with ADL scale. Hazard ratios for death were significantly different  
12 among JCS categories: 1.00 (as reference), 5.55, 9.54 and 34.21 in JCS0, 1, 2 and 3,  
13  
14 respectively. It is noteworthy that a simple one-axis test alone predicts early mortality  
15  
16 with such clear differences. The JCS could be useful especially at an emergency setting  
17  
18 when more detailed evaluation of a patient condition is difficult to obtain and prompt  
19  
20 communications among doctors and co-medicals are needed. The JCS provides  
21  
22 minimum but critical/essential information.  
23  
24  
25  
26  
27  
28  
29  
30

31  
32 2) Simplicity.  
33

34  
35 The JCS is a 4-points scale (from 0 to 3) and comprises only one test: eye responses.  
36  
37 The Glasgow coma scale (GCS), for example, is a 13-points scale (from 3 to 15) and  
38  
39 comprises three tests: eye, verbal and motor responses. The JCS is similar to the eye  
40  
41 response test in the GCS but even simpler than the GCS (i.e. both E2 and E3 belong in  
42  
43 JCS2). Being a uni-coordinate axis scale is very important for simplicity. Although  
44  
45 summing up scores in a multi-coordinate axes scale may not be difficult, the scores in  
46  
47 different axes may have different values and therefore the interpretation of a total score  
48  
49 can be difficult. Hypothetically, both E3V2M1 and E2V3M1 in the GCS, for example,  
50  
51  
52  
53  
54  
55  
56  
57  
58  
59  
60

1  
2  
3  
4  
5  
6 give the same total score of 6. A same total score in a multi-coordinate axes scale could  
7  
8  
9 reflect different underlying conditions and might be difficult to interpret. The  
10  
11 description within the JCS is also simple (e.g. JCS, JCS0, JCS1, JCS2 and JCS3), which  
12  
13 makes communication among staff easy, prompt and less misleading. It is much easier  
14  
15 to grasp the outline of a patient condition with the JCS than with any multi-axes scales.  
16  
17  
18  
19

### 20 3) Reliability.

21  
22 The simplicity of the JCS provides consistency among raters.

23  
24 The four categories in the JCS are well defined. They do not overlap and they  
25  
26 encompass all consciousness levels.  
27  
28  
29  
30

### 31 4) Applicability.

32  
33 The JCS focuses on eye response, which broadens its applicability both for raters and  
34  
35 for patients. Raters need only check eye responses in terms of three clearly  
36  
37 differentiated categories: open, open only after stimuli and closed. No special  
38  
39 knowledge, such as is needed to assess the decerebrate or decorticate response, is  
40  
41 necessary. The JCS is applicable to almost all patients, including patients with aphasia,  
42  
43 paresis and even in intubated patients, where it might be difficult to apply the GCS,  
44  
45 because that has verbal and motor responses tests. In this population-based study, the  
46  
47 JCS was applied to 13,406 out of 13,788 stroke patients (97.2%).  
48  
49  
50  
51  
52  
53  
54  
55  
56  
57  
58  
59  
60

### *Historical information on the JCS*

Ohta et al. launched a national survey on craniotomy for ruptured cerebral aneurysms, and described the JCS to define the consciousness level to be included in the survey, at the first meeting of the Society on Surgery for Cerebral Stroke, which was held at Miyagi, Japan (Sakunami Kanko Hotel) on May 13-14, 1972<sup>8</sup>. At that meeting, he also organized a team to evaluate the scale, because there was no standardized coma scale established in those days. The JCS was based on his study on factors affecting the prognosis of ruptured aneurysm patients after surgical interventions<sup>9</sup>. The JCS was called the 3 group 3 grade method at first and then the “3-3-9 method”<sup>10</sup>, since the detailed version of the scale composed of four categories: alert, 1-digit code, 2-digit code and 3-digit code, with each digit code having three subcategories (1, 2 and 3 in the 1-digit code, 10, 20 and 30 in the 2-digit code, and 100, 200 and 300 in the 3-digit code)<sup>1</sup>. It had 10 grades in total: alert plus 9 (3 by 3) grades. This version of the JCS included a motor response test in the 3-digit code patients and three special conditions: restlessness, incontinence and apathy. The first full paper was accepted on 30 November 1973 and published in 1974<sup>1</sup>. In this study, we applied the simple JCS without

1  
2  
3  
4  
5  
6 subcategories, which is commonly used in Japan.  
7  
8  
9

10  
11  
12 ***Limitations & Responses***  
13

- 14  
15  
16  
17  
18 1) Simplicity means lack of detail. The JCS does not evaluate verbal or motor  
19  
20 responses, which are tested in the GCS. The total score in the GCS ranges from 3  
21  
22 to 15 and the GCS can theoretically describe 120 (4 by 5 by 6) different conditions.  
23  
24  
25 The more tests a scale includes, the more details a scale can evaluate<sup>11 12</sup>.  
26  
27  
28

29 ***Response:***  
30

31  
32 As far as the hazard ratios for early death and ADL scores, the JCS is sufficient as a  
33  
34 predictor. A single-dimensional test is the best if the purpose of the test is fulfilled. If  
35  
36 needed, we can describe a patient's condition in a detailed way: such as decerebrate  
37  
38 posture and decorticate posture. In the JCS, three capital letters, R, I and A, are  
39  
40 provided to describe restlessness, incontinence and apathy, respectively.  
41  
42  
43  
44  
45  
46  
47  
48

- 49  
50 2) Consciousness levels may fluctuate even in a short period and scores may therefore  
51  
52 be different from time to time.  
53  
54

55 ***Response:***  
56  
57  
58  
59  
60

1  
2  
3  
4  
5  
6 This difficulty is common to every coma scale, and the simplicity of the JCS  
7  
8  
9 minimizes it. A multi-dimensional scale might cause more difficulty with evaluation  
10  
11  
12 .

- 13  
14  
15 3) Predictability of the outcome has inherent limitations<sup>13</sup>. The outcomes and therefore  
16  
17 the hazard ratios for death depend not only on the baseline severity but also on the  
18  
19 treatment and patient conditions, including complications. This study did not  
20  
21 include the treatments which must affect outcomes.  
22  
23  
24

25  
26 **Response:**  
27

28  
29 For precise evaluation of a relationship between two factors, it should be important  
30  
31 to adjust for all the other factors. Treatments, for example, often vary from a case to  
32  
33 case. Adjustments for them are virtually impossible in a population based study.  
34  
35 Major treatments for stroke, such as tPA therapy or surgical interventions, however,  
36  
37 should not have caused a major bias in this study, because the differences in hazard  
38  
39 ratios among the consciousness levels based on the JCS remain significant after  
40  
41 adjustment for stroke subtypes, i.e. CI, CH and SAH. The JCS also predicted the  
42  
43 outcomes in each three subtype of stroke by uni-variable analyses. A tPA therapy is  
44  
45 not applied for hemorrhagic stroke and surgical interventions are rarely applied for  
46  
47 ischemic stroke (In this study cohort, 374 (4.2%) out of 8896 CI patients had  
48  
49  
50  
51  
52  
53  
54  
55  
56  
57  
58  
59  
60



1  
2  
3  
4  
5  
6 surgical treatment).

7  
8  
9 There are two types of complications: ones that patients had before stroke onset and  
10  
11 ones that they got after the onset. Although the former comprises numerous diseases,  
12  
13 risk factors such as hypertension, arrhythmia and diabetes mellitus might be  
14  
15 important. The difference in hazard ratios remained significant after adjustment for  
16  
17 these three. The latter may include urinary tract infections, decubitus ulcers and  
18  
19 pneumonia. They, however, occur as results of stroke, namely after the  
20  
21 consciousness level estimation based on the JCS. Although they could be related to  
22  
23 the initial severity of the stroke, data on this type of complications were not  
24  
25 available in this study.  
26  
27  
28  
29  
30  
31  
32  
33  
34  
35  
36  
37

### 38 **Conclusions**

39  
40  
41  
42  
43 The Japan Coma Scale is a good predictor of stroke outcome. Its two outstanding  
44  
45 advantages, simplicity and predictability, should make the JCS re-appreciated  
46  
47 internationally as a standard coma scale.  
48  
49  
50  
51  
52  
53  
54  
55  
56  
57  
58  
59  
60

**Acknowledgments**

We acknowledge the contribution of participating institutions and their staffs who provided data in the development of the Kyoto Stroke Registry. We thank Dr Tomio Ohta for the information on the establishment of the JCS.

**Funding**

None

**Contributorship**

All authors contributed equally in the data collection and analysis. KS wrote the manuscript. All authors read and approved the final manuscript.

**Data Sharing**

Annual reports of the Kyoto Stroke Registry are available at the Kyoto Medical Association.

**Competing Interests**

None

## References

1. Ohta T, Waga S, Handa W, Saito I, Takeuchi K. [New grading of level of disordered consciousness (author's transl)]. *No shinkei geka. Neurological surgery* 1974;2(9):623-7.
2. Ohta T, Kikuchi H, Hashi K, Kudo Y. Nizofenone administration in the acute stage following subarachnoid hemorrhage. Results of a multi-center controlled double-blind clinical study. *Journal of neurosurgery* 1986;64(3):420-6.
3. Shigemori M, Abe T, Aruga T, Ogawa T, Okudera H, Ono J, et al. Guidelines for the Management of Severe Head Injury, 2nd edition guidelines from the Guidelines Committee on the Management of Severe Head Injury, the Japan Society of Neurotraumatology. *Neurologia medico-chirurgica* 2012;52(1):1-30.
4. Teasdale G, Jennett B. Assessment of coma and impaired consciousness. A practical scale. *Lancet* 1974;2(7872):81-4.
5. Weir CJ, Bradford AP, Lees KR. The prognostic value of the components of the Glasgow Coma Scale following acute stroke. *QJM : monthly journal of the Association of Physicians* 2003;96(1):67-74.
6. Shigematsu K, Shimamura O, Nakano H, Watanabe Y, Sekimoto T, Shimizu K, et al. Vomiting should be a prompt predictor of stroke outcome. *Emergency medicine journal : EMJ* 2012.
7. Hatano S. Experience from a multicentre stroke register: a preliminary report. *Bulletin of the World Health Organization* 1976;54(5):541-53.
8. Ohta T SN. The research on prognosis prediction of surgical interventions for ruptured cerebral aneurysm - production of ABC index- the first report: the shortcomings of the conventional classification system of severity and determination of predicting factors of surgical prognosis. *The First Meeting of Society on Surgery for Cerebral Stroke (In Japanese)* 1972:1-20.
9. Ohta T WS, Saito I, Masugi N, Suzuki J, Takaku A. The survey on therapeutic strategy of cerebral aneurysm and prognosis after surgical interventions. *The Second Meeting of Society on Surgery for Cerebral Stroke (In Japanese)* 1973;2:55-75.
10. Ohta T WS, Handa H, Saito I, Takeuchi K, Masugi N, Suzuki J, Takaku A. The new grading system for disturbed consciousness and its numerical expression; the 3-3-9 degrees method. *The Third Meeting of Society on Surgery for Cerebral Stroke (In Japanese)* 1974;3:61-68.

11. Lingsma HF, Roozenbeek B, Steyerberg EW, Murray GD, Maas AI. Early prognosis in traumatic brain injury: from prophecies to predictions. *Lancet neurology* 2010;9(5):543-54.
12. Wijdicks EF, Rabinstein AA, Bamlet WR, Mandrekar JN. FOUR score and Glasgow Coma Scale in predicting outcome of comatose patients: a pooled analysis. *Neurology* 2011;77(1):84-5.
13. Chandra RV, Law CP, Yan B, Dowling RJ, Mitchell PJ. Glasgow coma scale does not predict outcome post-intra-arterial treatment for basilar artery thrombosis. *AJNR. American journal of neuroradiology* 2011;32(3):576-80.

1  
2  
3  
4  
5  
6 **Legends**  
7

8 **Figure 1. Kaplan-Meier Survival curves for patients in each JCS category**  
9  
10  
11  
12  
13  
14  
15  
16  
17  
18  
19  
20  
21  
22  
23  
24  
25  
26  
27  
28  
29  
30  
31  
32  
33  
34  
35  
36  
37  
38  
39  
40  
41  
42  
43  
44  
45  
46  
47  
48  
49  
50  
51  
52  
53  
54  
55  
56  
57  
58  
59  
60

For peer review only

Table 1 The characteristics of patients in the study cohort

| Characteristic                                    |
|---------------------------------------------------|
| 1) Age                                            |
| 2) Sex (%of female, (n=female /male))             |
| 3) Subtype (CI/CH/SAH, % (n))                     |
| 4) Systolic blood pressure                        |
| 5) Diastolic blood pressure                       |
| 6) Paresis (% (n=with/without))                   |
| 7) Hypertension history (% (n=with/without))      |
| 8) Arrhythmia history (% (n=with/without))        |
| 9) Diabetes mellitus history (% (n=with/without)) |

Table 1 Continued

|    | JCS0 (n=7676)                                        | JCS1 (n=2619)                                      | JCS2 (n=1602)                                 | JCS3 (n=1509)                   |
|----|------------------------------------------------------|----------------------------------------------------|-----------------------------------------------|---------------------------------|
| 1) | 69.7±12.3* <sup>123</sup>                            | 73.4±12.3* <sup>3</sup>                            | 73.6±14.2* <sup>3</sup>                       | 72.3±14.0                       |
| 2) | 39.8<br>(3056/4620)* <sup>123</sup>                  | 47.7<br>(1249/1370)* <sup>23</sup>                 | 56.9<br>(911/691)* <sup>3</sup>               | 54.7 (826/683)                  |
| 3) | 78.9/15.7/5.4<br>(6048/1201/415)<br>* <sup>123</sup> | 57.7/35.2/7.1<br>(1508/921/185)<br>* <sup>23</sup> | 48.5/39.0/12.5<br>(774/622/200)* <sup>3</sup> | 28.0/47.7/24.3<br>(421/716/365) |
| 4) | 159.3±28.2* <sup>123</sup>                           | 162.7±31.7* <sup>3</sup>                           | 163.6±33.3* <sup>3</sup>                      | 167.4±42.1                      |
| 5) | 87.0±17.1* <sup>123</sup>                            | 88.0±19.0* <sup>3</sup>                            | 88.6±20.6                                     | 89.8±24.4                       |
| 6) | 67.0<br>(5085/2501)* <sup>123</sup>                  | 78.2<br>(2014/561)* <sup>23</sup>                  | 83.1<br>(1278/260)* <sup>3</sup>              | 89.2<br>(1060/128)              |
| 7) | 64.5<br>(4724/2605)* <sup>123</sup>                  | 61.0<br>(1476/942)* <sup>23</sup>                  | 59.8<br>(857/576)* <sup>3</sup>               | 59.3 (755/518)                  |
| 8) | 14.5<br>(1058/6233)* <sup>123</sup>                  | 23.3<br>(569/1870)* <sup>23</sup>                  | 28.2<br>(412/1047)* <sup>3</sup>              | 20.1<br>(254/1010)              |
| 9) | 23.6<br>(1734/5629)* <sup>123</sup>                  | 18.3<br>(449/2006)* <sup>23</sup>                  | 15.1 (220/1237)                               | 16.4<br>(209/1067)              |

\*<sup>1</sup>: significant difference between JCS0 and JCS1

1  
2  
3  
4  
5  
6 \*<sup>2</sup>: significant difference between JCS1 and JCS2  
7

8  
9 \*<sup>3</sup>: significant difference between JCS2 and JCS3  
10

11 Data on some characteristics were missing in a few patients.  
12  
13  
14  
15  
16  
17  
18  
19  
20  
21  
22  
23  
24  
25  
26  
27  
28  
29  
30  
31  
32  
33  
34  
35  
36  
37  
38  
39  
40  
41  
42  
43  
44  
45  
46  
47  
48  
49  
50  
51  
52  
53  
54  
55  
56  
57  
58  
59  
60

For peer review only

Table 2 Numbers of patients categorized by JCS and by ADL scale.

|              | Japan Coma Scale |      |       |       | Total |
|--------------|------------------|------|-------|-------|-------|
|              | JCS0             | JCS1 | JCS 2 | JCS 3 |       |
| <b>ADL1</b>  | 4621             | 608  | 199   | 65    | 5493  |
| <b>ADL2</b>  | 1908             | 816  | 365   | 104   | 3193  |
| <b>ADL3</b>  | 417              | 442  | 287   | 111   | 1257  |
| <b>ADL4</b>  | 146              | 276  | 325   | 296   | 1043  |
| <b>ADL5</b>  | 102              | 201  | 227   | 761   | 1291  |
| <b>Total</b> | 7194             | 2343 | 1403  | 1337  | 12277 |

We obtained data on both the JCS and the ADL scale in 12,277 (89.0%) of the stroke patients.



Table 3 Hazard ratios for death, comparing JCS categories

|              | Hazard Ratio | 95% Confidence Interval |       | p      |
|--------------|--------------|-------------------------|-------|--------|
|              |              | Lower                   | Upper |        |
| <b>JCS 0</b> | Reference    |                         |       |        |
| <b>JCS 1</b> | 5.55         | 4.19                    | 7.37  | <0.001 |
| <b>JCS 2</b> | 9.54         | 7.16                    | 12.71 | <0.001 |
| <b>JCS 3</b> | 34.21        | 26.10                   | 44.83 | <0.001 |

Adjusted for age, sex, systolic and diastolic blood pressures, history (hypertension, arrhythmia and diabetes mellitus), stroke type and paresis

1  
2  
3  
4  
5  
6  
7  
8  
9  
10  
11  
12  
13  
14  
15  
16  
17  
18  
19  
20  
21  
22  
23  
24  
25  
26  
27  
28  
29  
30  
31  
32  
33  
34  
35  
36  
37  
38  
39  
40  
41  
42  
43  
44  
45  
46  
47  
48  
49  
50  
51  
52  
53  
54  
55  
56  
57  
58  
59  
60

Figure 1

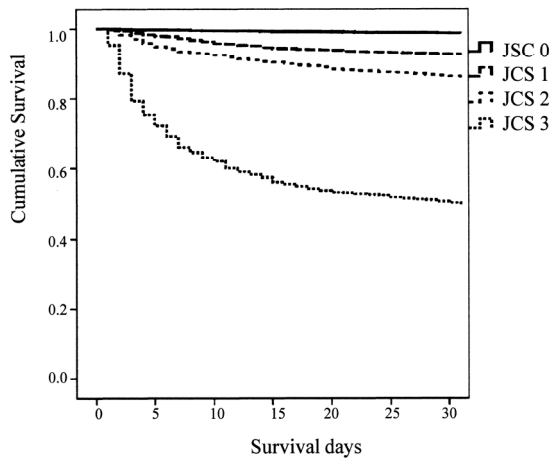

Kaplan-Meier Survival curves for patients in each JCS category  
215x156mm (300 x 300 DPI)

view only

1  
2  
3  
4  
5  
6  
7  
8  
9  
10  
11  
12  
13  
14  
15  
16  
17  
18  
19  
20  
21  
22  
23  
24  
25  
26  
27  
28  
29  
30  
31  
32  
33  
34  
35  
36  
37  
38  
39  
40  
41  
42  
43  
44  
45  
46  
47  
48  
49  
50  
51  
52  
53  
54  
55  
56  
57  
58  
59  
60

Figure 1A-Suppl Kaplan-Meier Survival curves of patients in each JCS category  
Cerebral infarction

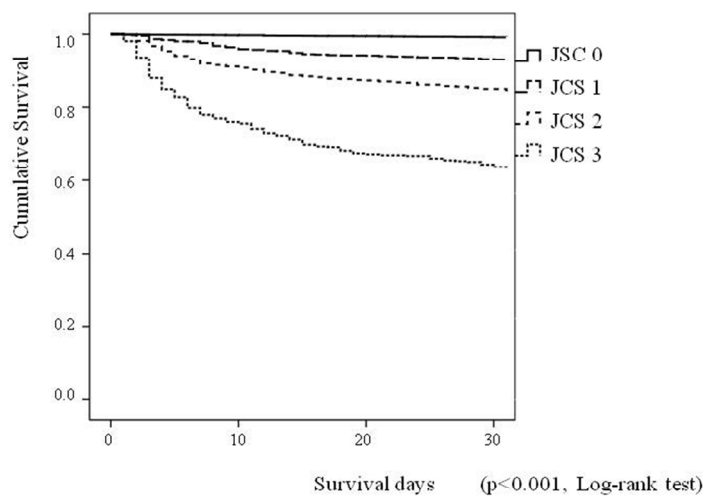

Kaplan-Meier Survival curves of patients in each JCS category  
Cerebral infarction

254x190mm (96 x 96 DPI)

1  
2  
3  
4  
5  
6  
7  
8  
9  
10  
11  
12  
13  
14  
15  
16  
17  
18  
19  
20  
21  
22  
23  
24  
25  
26  
27  
28  
29  
30  
31  
32  
33  
34  
35  
36  
37  
38  
39  
40  
41  
42  
43  
44  
45  
46  
47  
48  
49  
50  
51  
52  
53  
54  
55  
56  
57  
58  
59  
60

Figure 1B-Suppl Kaplan-Meier Survival curves of patients in each JCS category  
Cerebral hemorrhage

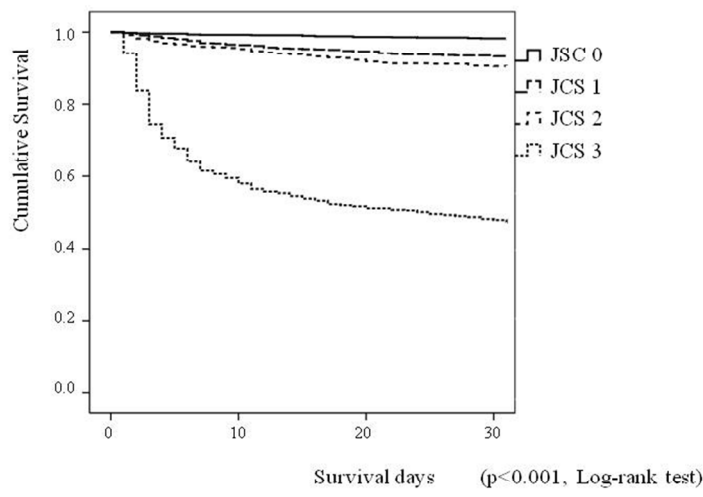

Kaplan-Meier Survival curves of patients in each JCS category  
Cerebral hemorrhage

254x190mm (96 x 96 DPI)

Peer Review Only

Figure 1C-Suppl Kaplan-Meier Survival curves of patients in each JCS category Subarachnoid hemorrhage

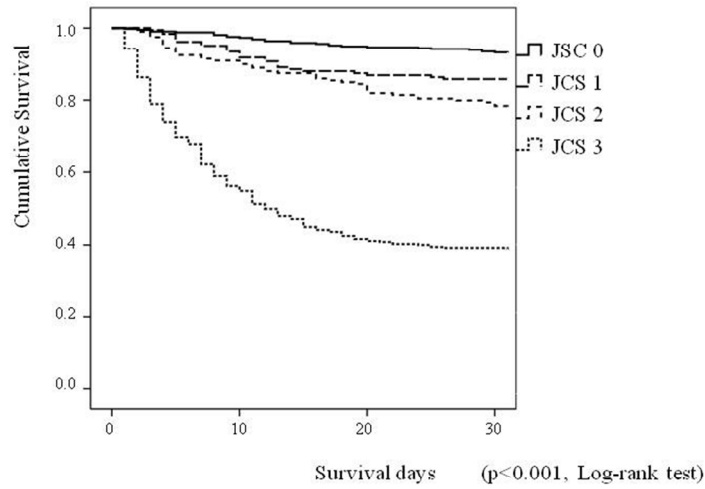

Kaplan-Meier Survival curves of patients in each JCS category Subarachnoid hemorrhage

254x190mm (96 x 96 DPI)

Peer Review Only

1  
2  
3  
4  
5  
6  
7  
8 **A simple coma scale predicts stroke outcome**

9 **Re-introduction of Japan Coma Scale**

10  
11  
12 **Short title: The Japan Coma Scale predicts stroke outcome**

13  
14  
15 Kazuo Shigematsu<sup>1</sup>, Hiromi Nakano<sup>2</sup>, Yoshiyuki Watanabe<sup>3</sup>, Tatsuyuki Sekimoto<sup>4</sup>,  
16 Kouichiro Shimizu<sup>5</sup>, Akihiko Nishizawa<sup>6</sup>, Atsushi Okumura<sup>7</sup>, Masahiro Makino<sup>8</sup>,  
17 Kazuhiko Bando<sup>9</sup>, ~~Yasushi Kitagawa<sup>10</sup>~~

18  
19  
20 <sup>1</sup>Department of Neurology, National Hospital Organization, Minami Kyoto Hospital,  
21 Kyoto, Japan

22 <sup>2</sup>Department of Neurosurgery, Kyoto Kidugawa Hospital, Kyoto, Japan

23 <sup>3</sup>Department of Epidemiology for Community Health and Medicine, Kyoto Prefectural  
24 University of Medicine, Graduate School of Medical Science, Kyoto, Japan

25 <sup>4</sup>Department of Neurosurgery, Kyoto Prefectural Yosanoumi Hospital, Kyoto, Japan

26 <sup>5</sup>Department of Neurosurgery, Kyoto Fushimi Shimizu Hospital, Kyoto, Japan

27 <sup>6</sup>Department of Internal Medicine, The Nishizawa Clinic, Kyoto, Japan

28 <sup>7</sup>Department of Neurosurgery, Jujyo Rehabilitation Hospital, Kyoto, Japan

29 <sup>8</sup>Department of Neurology, Japanese Red Cross Kyoto Daini Hospital, Kyoto, Japan

30 <sup>9</sup>Department of Internal Medicine, The Bando Clinic, Kyoto, Japan

31 ~~<sup>10</sup>Department of Internal Medicine, The Kitagawa Clinic, Kyoto, Japan~~

32  
33  
34  
35  
36 Correspondence to Kazuo Shigematsu

37 Department of Neurology, the National Hospital Organization, Minami Kyoto Hospital

38 11 Nakaashihara, Joyo, Kyoto, Japan, 610-0113

39  
40  
41  
42  
43  
44  
45  
46  
47  
48  
49  
50  
51  
52  
53  
54  
55  
56  
57  
58  
59  
60  
Phone 81-774-52-0065, Fax 81-75-821-9610, E-mail: [neuron@k07.gmail.com](mailto:neuron@k07.gmail.com)]

**Key Words:** scales; coma; consciousness; stroke

~~**Contributors**Contributorship: All authors contributed equally to this study in the data  
collection and analysis. KS wrote the manuscript. All authors read and approved the  
final manuscript.~~

Conflicts of Interest: None

Funding: None

~~Word Count: 2454~~

**Formatted:** Left, Don't adjust space between Latin and Asian text, Don't adjust space between Asian text and numbers

**Formatted:** Font: Times New Roman, 12 pt, Font color: Custom Color(RGB(34,34,34)), Pattern: Clear (White)

**Formatted:** Font: Times New Roman, 12 pt, Bold, Italic

1  
2  
3  
4  
5  
6  
7  
8  
9  
10  
11  
12  
13  
14  
15  
16  
17  
18  
19  
20  
21  
22  
23  
24  
25  
26  
27  
28  
29  
30  
31  
32  
33  
34  
35  
36  
37  
38  
39  
40  
41  
42  
43  
44  
45  
46  
47  
48  
49  
50  
51  
52  
53  
54  
55  
56  
57  
58  
59  
60

|

For peer review only

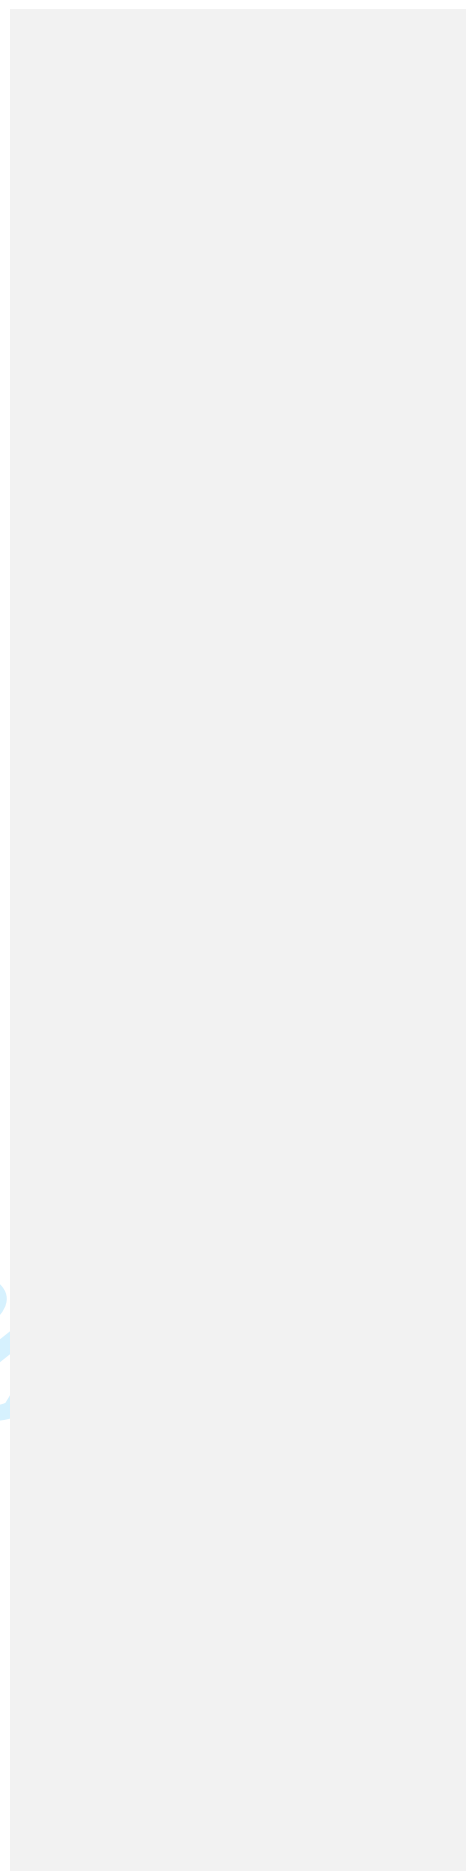

## Abstract

### Objective

Prompt assessment of consciousness level is vitally important during the emergency care of stroke patients. Requirements for a better scale include simplicity, reliability, applicability and predictability for outcome. The Japan Coma Scale (JCS) is a one-axis coma scale published in 1974 with outstanding simplicity. The hypothesis is that the JCS is sufficient to predict the stroke outcome. The aim of the study is to verify the predictability of the JCS, which should help the JCS attain international recognition.

### Methods

We investigated the relationship between consciousness level based on the JCS at the stroke onset and activities of daily living (ADL) at 30 days or deaths within 30 days in a large population-based stroke registry. We calculated Spearman's correlation coefficients for the correlation between the JCS and ADL scale, generated estimated survival curves by the Kaplan-Meier method and finally compared hazard ratios for

Formatted: Font color: Auto

Formatted: Font color: Text 1



1  
2  
3  
4  
5  
6  
7  
8  
9 death within 30 days after onset, comparing patients with different conscious levels  
10  
11 based on the JCS.  
12  
13

## 14 15 16 17 **Results**

18  
19  
20  
21 A total of 13,788 (97.2%) patients were graded based on the JCS. The JCS correlated to  
22  
23 ADL scores with a Spearman's correlation coefficient of 0.61. Hazard ratios for death  
24  
25 within 30 days were 1 (reference), 5.655, 9.554 and 35.221 in those scored as JCS0,  
26  
27 JCS1, JCS2 and JCS3, respectively.–  
28  
29  
30  
31  
32  
33

## 34 35 **Conclusions**

36  
37  
38  
39 Using a single test of eye response, the JCS has outstanding merits as a coma scale: i.e.  
40  
41 simplicity and applicability. The present study adds predictability for the early outcome  
42  
43 in stroke patients. The JCS is valuable especially at an emergency setting when a  
44  
45 prompt assessment of consciousness level is needed.  
46  
47  
48  
49  
50  
51  
52  
53  
54  
55  
56  
57  
58  
59  
60

1  
2  
3  
4  
5  
6  
7  
8  
9 **Article summary**

10  
11 **Article focus**

12 The Japan Coma Scale (JCS) is a one-axis coma scale published in 1974. It is so simple  
13 and easy to use that it has been established as a standard coma scale in Japan.  
14 Nevertheless, it has little recognition internationally. The aim of the study is to confirm  
15 its predictability in stroke patients. We hope the JCS will contribute to the medical  
16 profession and especially to the emergency medical-care.

17  
18  
19  
20  
21  
22  
23  
24  
25  
26  
27 **Key messages**

28 Using a single test of eye response, the JCS has outstanding merits as a coma scale: i.e.  
29 simplicity and applicability. The present study adds predictability for the early outcome  
30 in stroke patients. The JCS is valuable especially at an emergency setting when a  
31 prompt assessment of consciousness level is needed.

32  
33  
34  
35  
36  
37  
38  
39 **Strengths and limitations of this study**

40 Strengths: the study is based on a large stroke registry and the JCS has been used widely  
41 in Japan.

42 Limitations: there are few studies on the JCS and on the ADL scale in scientific  
43 international journals yet.

## Introduction

Formatted: Font: Not Bold

Prompt assessment of consciousness levels is vitally important during the emergency care of stroke patients. There is no current perfect coma scale, and requirements for a better scale include:

- 1) Simplicity: ease of assessment, ease of recording, ease of sharing with medical and co-medical staff.
- 2) Reliability: consistency among assessors.
- 3) Applicability: for any patient in any setting.
- 4) Predictability for the outcome.

The Japan Coma Scale (JCS) has become widely used in Japan since it was first published in 1974<sup>1-3</sup>. An outstanding feature of the JCS is its simplicity, which has prompted both pre-hospital personnel and in-hospital staff to use the scale. The JCS enables prompt communication among emergency service staff and hospital staff and among nurses and physicians. However, the JCS's predictability of the outcome has not been clarified to date. The lack of evidence of its predictability may have prevented the JCS from attaining international recognition.

1  
2  
3  
4  
5  
6  
7  
8  
9 Our hypothesis is that consciousness levels categorized by the JCS should correlate with  
10  
11 the severity of stroke and therefore should predict outcome of stroke. If the  
12  
13 predictability of the JCS is demonstrated, it should be re-appraised as a prompt coma  
14  
15 scale. Although we have the Glasgow Coma Scale (GCS), which was also published in  
16  
17 1974<sup>45</sup>, it would be more pragmatic to have a simpler coma scale especially in an  
18  
19 emergency. The major difference between the GCS and the JCS is that the former is a  
20  
21 three-axis scale whereas the latter is a one-axis scale.  
22  
23

24  
25  
26 The aim of the study is to show that the JCS predicts early outcome, including the level  
27  
28 of activity of daily life (ADL) and the hazard ratios for death, and, subsequently, to  
29  
30 re-introduce this simple coma scale to the world.  
31  
32  
33  
34  
35  
36

### 37 **Materials and Methods**

38  
39  
40  
41

42 We studied the relationship between the outcome at 30 days after stroke and the  
43  
44 consciousness levels based on the JCS at the onset of neurological impairment. We  
45  
46 analyzed all new stroke patients identified from January 1999 to December 2009  
47  
48

49 inclusive in the entire Kyoto prefecture and registered in the Kyoto Stroke Registry.

50  
51  
52 (KSR)<sup>6</sup>. Detailed information on the KSR has been described previously (Shigematsu  
53  
54  
55  
56  
57  
58  
59  
60

1  
2  
3  
4  
5  
6  
7  
8  
9 [et al. BMJ Open, in press](#)). The diagnosis of stroke was confirmed by local neurologists  
10 and/or neurosurgeons according to the WHO definition <sup>7</sup>. We categorized the patients  
11 into cerebral infarction (CI), cerebral hemorrhage (CH), subarachnoid hemorrhage  
12 (SAH) and others, based on the neurological findings, laboratory data, and findings of  
13 CT, MRI and angiography. ~~—~~

14  
15  
16  
17  
18  
19  
20  
21  
22  
23  
24 We used the following definitions ~~for the purpose of this study~~.

25  
26  
27 1) Consciousness levels based on the JCS encompassed four levels:

- 28 1 JCS 0 (alert)
- 29 2 JCS 1 (not fully alert but awake without any stimuli)
- 30 3 JCS 2 (arousable with stimulation)
- 31 4 JCS 3 (unarousable)

32  
33  
34  
35  
36  
37  
38  
39 2) ADL scale at 30 days after stroke onset included five levels:

- 40 1 ADL1 (No symptoms or no significant disability. Able to carry out all usual  
41 activities without help. Able to walk without a mobility aide)
- 42 2 ADL2 (mildly disabled, or utilization of mobility aide. Unable to carry out all  
43 usual activities without help. Unable to walk without mobility aide.)
- 44 3 ADL3 (moderately disabled, or wheelchair-bound condition. Unable to walk  
45  
46  
47  
48  
49  
50  
51  
52  
53  
54  
55  
56  
57  
58  
59  
60

1  
2  
3  
4  
5  
6  
7  
8  
9 without assistance.)

10  
11 4 ADL4 (severely disabled, or bed-bound condition. Unable to use wheel chairs

12  
13 without help.)

14  
15  
16 5 ADL5 (Dead)

17  
18  
19 ~~We sent out a questionnaire on what coma scale they preferably used in practice to 219-~~  
20  
21 ~~local nurses and members of rescue squads.~~  
22  
23

24  
25  
26  
27  
28 ***Ethics Statement***

29  
30  
31 This research was performed in accordance with the ethical principles for medical  
32  
33 research involving human subjects outlined in the Declaration of Helsinki. This research  
34  
35 was approved by the Board of Directors, the Kyoto Medical Association, the  
36  
37 Department of Health and Welfare, Kyoto Prefecture and Ethics Committee of the  
38  
39 National Hospital Organization, Minami Kyoto Hospital. Since all identifying personal  
40  
41 information was stripped from the secondary files before analysis, the boards waived  
42  
43 the requirement for written informed consent from the patients involved.  
44  
45  
46  
47  
48

49  
50 ***Statistical Analyses***

51  
52 The frequencies of characteristics among the four conscious levels were determined and  
53  
54  
55  
56  
57  
58  
59  
60

1  
2  
3  
4  
5  
6  
7  
8  
9 evaluated for univariate associations by Chi-square analysis. Numerical data such as age  
10  
11 and blood pressure were compared with Student-t ~~teststest~~. Spearman's rank correlation  
12  
13 coefficients were used to identify the correlation between the JCS and ADL scale. We  
14  
15 used the Kaplan-Meier method for curves of estimated survival, a log-rank test for  
16  
17 comparisons of estimated survival among the JCS categories, and ~~the~~ Cox proportional  
18  
19 hazards regression for hazard ratios for death. Adjustments for age, sex, systolic and  
20  
21 diastolic blood pressures, histories of hypertension, arrhythmia and diabetes mellitus,  
22  
23 stroke type and paresis were also utilized. Analyses were performed using SPSS ver.19.  
24  
25  
26  
27  
28  
29 All reported p values are 2-sided.  
30  
31  
32  
33

## 34 Results

35  
36  
37  
38  
39 The characteristics of patients are summarized in Table 1. Data on age, and sex were  
40  
41 complete in all patients in the study cohort. The other characteristics had missing data in  
42  
43 a few patients. The numbers of patients examined are shown in the tables.  
44  
45

46  
47 We evaluated the consciousness levels of 13,406 patients out of 13,788 (97.2%), based  
48  
49 on the JCS. JCS data were missing for 382 patients (2.8%). Among the 13,406 patients,  
50  
51 the number and percentage per group were as follows: JCS0 (~~76767~~,676 [55.7%]), JCS1  
52  
53  
54  
55  
56  
57  
58  
59  
60

Formatted: Font color: Auto

1  
2  
3  
4  
5  
6  
7  
8  
9 | (~~26192.619~~ [9.0%]), JCS2 (~~16021.602~~ [11.6%]) and JCS3 (~~15091.509~~ [10.9%]),  
10  
11 | respectively. We evaluated the ADL scale in 12,601 (91.4%) patients at 30 days after the  
12  
13 | onset of neurological impairment. We obtained data on both the JCS and the ADL scale  
14  
15 | in 12,277 (89.0%) of the stroke patients (Table 2).  
16  
17 |

18  
19 | The Spearman's correlation coefficient was 0.608 for the correlation between the JCS  
20  
21 | and ADL scale ( $p < 0.001$ ). Kaplan-Meier Survival curves of patients in each JCS  
22  
23 | category are presented (Figure 1). A log-rank test proved the differences were  
24  
25 | significant ( $p < 0.001$ ). For Kaplan-Meier Survival curves in each JCS category in each  
26  
27 | stroke subtype, see supplementary figures (Figure 1A, 1B and 1C).  
28  
29 |

30  
31 | Hazard ratios for death, comparing JCS categories and their 95% confidential intervals,  
32  
33 | are summarized in Table 3.  
34  
35 |

36  
37 | ~~As for the questionnaire on coma scales, 204 out of 219 (93.1%) nurses and members of~~  
38  
39 | ~~rescue squads answered that they mainly used the JCS.~~  
40  
41 |

## 42 43 44 | **Discussion**

45  
46  
47  
48  
49 | The JCS principally focuses on eye responses. Being a single test, the JCS has  
50  
51 | outstanding merits as a coma scale: i.e. simplicity and applicability, which should  
52  
53 |

Formatted: Font color: Auto



1  
2  
3  
4  
5  
6  
7  
8  
9 minimize interpreter errors. Simplicity is very important in communication among  
10  
11 physicians, nurses and paramedics, especially in emergency settings. The present study  
12  
13 adds to its virtues the predictability for early outcome in stroke patients.  
14  
15

16 In summary, the advantages of the JCS include four points:

17  
18  
19 1) Predictability for stroke outcome.

20  
21 This study showed the predictability of the JCS for the stroke outcome.

22  
23  
24 ~~The JCS correlated with ADL scale and hazard ratios for death in stroke patients. The~~  
25  
26 ~~likelihood of the differences in hazard ratios occurring by chance is estimated to be~~  
27  
28  ~~$6.32 \times 10^{-171}$  (after adjustment for age, gender, blood pressure, histories of hypertension,~~  
29  
30 ~~arrhythmia and diabetes, stroke type and paresis). The JCS correlated with ADL scale.~~  
31  
32 Hazard ratios for death were significantly different among JCS categories: 1.00 (as  
33  
34 reference), 5.55, 9.54 and 34.21 in JCS0, 1, 2 and 3, respectively. It is noteworthy that a  
35  
36 simple one-axis test alone predicts early mortality with such clear differences. The JCS  
37  
38 could be useful especially at an emergency setting when more detailed evaluation of a  
39  
40 patient condition is difficult to obtain and prompt communications among doctors and  
41  
42 co-medicals are needed. The JCS provides minimum but critical/essential information.  
43  
44  
45  
46  
47  
48

49  
50 2) Simplicity.

51  
52 The JCS is a 4-points scale (from 0 to 3) and comprises only one test: eye responses.  
53  
54  
55  
56  
57  
58  
59  
60

1  
2  
3  
4  
5  
6  
7  
8  
9 The Glasgow coma scale (GCS), for example, is a 13-points scale (from 3 to 15) and  
10  
11 comprises three tests: eye, verbal and motor responses. The JCS is similar to the eye  
12  
13 response test in the GCS but even simpler than the GCS (i.e. both E2 and E3 belong in  
14  
15 JCS2). Being a uni-coordinate axis scale is very important for simplicity. Although  
16  
17 summing up scores in a multi-coordinate axes scale may not be difficult, the scores in  
18  
19 different axes may have different values and therefore the interpretation of a total score  
20  
21 can be difficult. Hypothetically, both E3V2M1 and E2V3M1 in the GCS, for example,  
22  
23 give the same total score of 6. A same total score in a multi-coordinate axes scale could  
24  
25 reflect different underlying conditions and might be difficult to interpret. The  
26  
27 description within the JCS is also simple (e.g. JCS, JCS0, JCS1, JCS2 and JCS3), which  
28  
29 makes communication among staff easy, prompt and less misleading. It is much easier  
30  
31 to grasp the outline of a patient condition with the JCS than with any multi-axes scales.  
32  
33  
34  
35  
36  
37  
38  
39

### 40 3) Reliability.

41  
42 The simplicity of the JCS provides consistency among raters.

43  
44 The four categories in the JCS are well defined. They do not overlap and they  
45  
46 encompass all consciousness levels.  
47  
48

### 49 4) Applicability.

50  
51 The JCS focuses on eye response, which broadens its applicability both for raters and  
52  
53  
54  
55  
56  
57  
58  
59  
60

1  
2  
3  
4  
5  
6  
7  
8  
9 for patients. Raters need only check eye responses in terms of three clearly  
10  
11 differentiated categories: open, open only after stimuli and closed. No special  
12  
13 knowledge, such as is needed to assess the decerebrate or decorticate response, is  
14  
15 necessary. The JCS is applicable to almost all patients, including patients with aphasia,  
16  
17 paresis and even in intubated patients, where it might be difficult to apply the GCS,  
18  
19 because that has verbal and motor responses tests. In this population-based study, the  
20  
21 JCS was applied to 13,406 out of 13,788 stroke patients (97.2%).  
22  
23  
24  
25  
26  
27  
28

### 29 *Historical information on the JCS*

30  
31  
32  
33

34 Ohta et al. launched a national survey on craniotomy for ruptured cerebral aneurysms,  
35  
36 and described the JCS to define the consciousness level to be included in the survey, at  
37  
38 the first meeting of the Society on Surgery for Cerebral Stroke, which was held at  
39  
40 Miyagi, Japan (Sakunami Kanko Hotel) on May 13-14, 1972<sup>8</sup>. At that meeting, he also  
41  
42 organized a team to evaluate the scale, because there was no standardized coma scale  
43  
44 established in those days. The JCS was based on his study on factors affecting the  
45  
46 prognosis of ruptured aneurysm patients after surgical interventions<sup>9</sup>. The JCS was  
47  
48 called the 3 group 3 grade method at first and then the “3-3-9 method”<sup>10</sup>, since the  
49  
50  
51  
52  
53  
54  
55  
56  
57  
58  
59  
60

1  
2  
3  
4  
5  
6  
7  
8  
9 detailed version of the scale composed of four categories: alert, 1-digit code, 2-digit  
10 code and 3-digit code, with each digit code having three subcategories (1, 2 and 3 in the  
11 1-digit code, 10, 20 and 30 in the 2-digit code, and 100, 200 and 300 in the 3-digit code)  
12  
13  
14  
15  
16  
17 <sup>1</sup>. It had 10 grades in total: alert plus 9 (3 by 3) grades. This version of the JCS included  
18 a motor response test in the 3-digit code patients and three special conditions:  
19  
20  
21 restlessness, incontinence and apathy. The first full paper was accepted on 30 November  
22  
23  
24 1973 and published in 1974<sup>1</sup>. In this study, we applied the simple JCS without  
25  
26  
27 subcategories, which is commonly used in Japan.  
28  
29  
30  
31

### 32 *Limitations & Responses*

- 33  
34  
35  
36  
37 1) Simplicity means lack of detail. The JCS does not evaluate verbal or motor  
38 responses, which are tested in the GCS. The total score in the GCS ranges from 3  
39  
40 to 15 and the GCS can theoretically describe 120 (4 by 5 by 6) different conditions.  
41  
42  
43  
44 The more tests a scale includes, the more details a scale can evaluate<sup>11 12</sup>.  
45  
46

### 47 *Response:*

48  
49  
50 As far as the hazard ratios for early death and ADL scores, the JCS is sufficient as a  
51  
52 predictor. A single-dimensional test is the best if the purpose of the test is fulfilled. If  
53  
54  
55  
56  
57  
58  
59  
60

1  
2  
3  
4  
5  
6  
7  
8  
9 needed, we can describe a patient's condition in a detailed way: such as decerebrate  
10 posture and decorticate posture. In the JCS, three capital letters, R, I and A, are  
11 provided to describe restlessness, incontinence and apathy, respectively.  
12  
13  
14  
15  
16  
17  
18

- 19 2) Consciousness levels may fluctuate even in a short period and scores may therefore  
20 be different from time to time.  
21  
22

23  
24 **Response:**

25  
26 This difficulty is common to every coma scale, and the simplicity of the JCS  
27 minimizes it. A multi-dimensional scale might cause more difficulty with evaluation  
28  
29  
30  
31  
32  
33

- 34 3) Predictability of the outcome has inherent limitations<sup>13</sup>. The outcomes and therefore  
35 the hazard ratios for death depend not only on the baseline severity but also on the  
36 treatment and patient conditions, including complications. This study did not  
37 include the treatments which must affect outcomes.  
38  
39  
40  
41  
42  
43  
44

45 **Response:**

46  
47 For precise evaluation of a relationship between two factors, it should be important  
48 to adjust for all the other factors. Treatments, for example, often vary from a case to  
49 case. Adjustments for them are virtually impossible in a population based study.  
50  
51  
52  
53  
54  
55  
56  
57  
58  
59  
60

1  
2  
3  
4  
5  
6  
7  
8  
9 Major treatments for stroke, such as tPA therapy or surgical interventions, however,  
10  
11 should not have caused a major bias in this study, because the differences in hazard  
12  
13 ratios among the consciousness levels based on the JCS remain significant after  
14  
15 adjustment for stroke subtypes, i.e. CI, CH and SAH. The JCS also predicted the  
16  
17 outcomes in each three subtype of stroke by uni-variable analyses. A tPA therapy is  
18  
19 not applied for hemorrhagic stroke and surgical interventions are rarely applied for  
20  
21 ischemic stroke (In this study cohort, 374 (4.2%) out of 8896 CI patients had  
22  
23 surgical treatment).  
24  
25  
26  
27  
28

29 There are two types of complications: ones that patients had before stroke onset and  
30  
31 ones that they got after the onset. Although the former comprises numerous diseases,  
32  
33 risk factors such as hypertension, arrhythmia and diabetes mellitus might be  
34  
35 important. The difference in hazard ratios remained significant after adjustment for  
36  
37 these three. The latter may include urinary tract infections, decubitus ulcers and  
38  
39 pneumonia. They, however, occur as results of stroke, namely after the  
40  
41 consciousness level estimation based on the JCS. Although they could be related to  
42  
43 the initial severity of the stroke, data on this type of complications were not  
44  
45 available in this study.  
46  
47  
48  
49  
50  
51  
52  
53  
54  
55  
56  
57  
58  
59  
60

## Conclusions

The Japan Coma Scale is ~~an excellent~~ a good predictor of stroke outcome. Its two outstanding advantages, simplicity and predictability, should make the JCS re-appreciated internationally as a standard coma scale.

## Acknowledgments

We acknowledge the contribution of participating institutions and their staffs who provided data in the development of the Kyoto Stroke Registry. We thank Dr Tomio Ohta for the information on the establishment of the JCS.

Formatted: Font: Not Bold, Not Italic

## References

1. Ohta T, Waga S, Handa W, Saito I, Takeuchi K. [New grading of level of disordered consciousness (author's transl)]. *No shinkei geka. Neurological surgery* 1974;2(9):623-7.
2. Ohta T, Kikuchi H, Hashi K, Kudo Y. Nizofenone administration in the acute stage following subarachnoid hemorrhage. Results of a multi-center controlled double-blind clinical study. *Journal of neurosurgery* 1986;64(3):420-6.
3. Shigemori M, Abe T, Aruga T, Ogawa T, Okudera H, Ono J, et al. Guidelines for the Management of Severe Head Injury, 2nd edition guidelines from the Guidelines Committee on the Management of Severe Head Injury, the Japan Society of Neurotraumatology. *Neurologia medico-chirurgica* 2012;52(1):1-30.
4. Teasdale G, Jennett B. Assessment of coma and impaired consciousness. A practical scale. *Lancet* 1974;2(7872):81-4.
5. Weir CJ, Bradford AP, Lees KR. The prognostic value of the components of the Glasgow Coma Scale following acute stroke. *QJM : monthly journal of the Association of Physicians* 2003;96(1):67-74.
6. Shigematsu K, Shimamura O, Nakano H, Watanabe Y, Sekimoto T, Shimizu K, et al. Vomiting should be a prompt predictor of stroke outcome. *Emergency medicine journal : EMJ* 2012.
7. Hatano S. Experience from a multicentre stroke register: a preliminary report. *Bulletin of the World Health Organization* 1976;54(5):541-53.
8. Ohta T SN. The research on prognosis prediction of surgical interventions for ruptured cerebral aneurysm - production of ABC index- the first report: the shortcomings of the conventional classification system of severity and determination of predicting factors of surgical prognosis. *The First Meeting of Society on Surgery for Cerebral Stroke (In Japanese)* 1972:1-20.
9. Ohta T WS, Saito I, Masugi N, Suzuki J, Takaku A. The survey on therapeutic strategy of cerebral aneurysm and prognosis after surgical interventions. *The Second Meeting of Society on Surgery for Cerebral Stroke (In Japanese)* 1973;2:55-75.
10. Ohta T WS, Handa H, Saito I, Takeuchi K, Masugi N, Suzuki J, Takaku A. The new grading system for disturbed consciousness and its numerical expression; the 3-3-9 degrees method. *The Third Meeting of Society on Surgery for Cerebral Stroke (In Japanese)* 1974;3:61-68.



11. Lingsma HF, Roozenbeek B, Steyerberg EW, Murray GD, Maas AI. Early prognosis in traumatic brain injury: from prophecies to predictions. *Lancet neurology* 2010;9(5):543-54.
12. Wijdicks EF, Rabinstein AA, Bamlet WR, Mandrekar JN. FOUR score and Glasgow Coma Scale in predicting outcome of comatose patients: a pooled analysis. *Neurology* 2011;77(1):84-5.
13. Chandra RV, Law CP, Yan B, Dowling RJ, Mitchell PJ. Glasgow coma scale does not predict outcome post-intra-arterial treatment for basilar artery thrombosis. *AJNR. American journal of neuroradiology* 2011;32(3):576-80.

1  
2  
3  
4  
5  
6  
7  
8  
9  
10  
11  
12  
13  
14  
15  
16  
17  
18  
19  
20  
21  
22  
23  
24  
25  
26  
27  
28  
29  
30  
31  
32  
33  
34  
35  
36  
37  
38  
39  
40  
41  
42  
43  
44  
45  
46  
47  
48  
49  
50  
51  
52  
53  
54  
55  
56  
57  
58  
59  
60

**Legends**

**Figure 1. Kaplan-Meier Survival curves for patients in each JCS category**

For peer review only



Table 1 The characteristics of patients in the study cohort

| Characteristic                                    | Overall (n=13788)                            |
|---------------------------------------------------|----------------------------------------------|
| 1) Age                                            | 71.3±12.9                                    |
| 2) Sex (%of female, (n=female /male))             | 45.2 (6233/7555)                             |
| 3) Subtype (CI/CH/SAH, % (n))                     | <del>65.4/25.7/8.7 (9011/3549/1197/31)</del> |
| 4) Systolic blood pressure                        | 161±31.5                                     |
| 5) Diastolic blood pressure                       | 87.6±18.9                                    |
| 6) Paresis (% (n=with/without))                   | 73.2 (9437/3450)                             |
| 7) Hypertension history (% (n=with/without))      | 62.6 (8005/4780)                             |
| 8) Arrhythmia history (% (n=with/without))        | 18.5 (2357/10415)                            |
| 9) Diabetes mellitus history (% (n=with/without)) | 20.9 (2689/10198)                            |

Formatted Table

Deleted Cells

Table 1 Continued

|    | JCS0 (n=7676)                                        | JCS1 (n=2619)                                      | JCS2 (n=1602)                                 | JCS3 (n=1509)                   |
|----|------------------------------------------------------|----------------------------------------------------|-----------------------------------------------|---------------------------------|
| 1) | 69.7±12.3* <sup>123</sup>                            | 73.4±12.3* <sup>3</sup>                            | 73.6±14.2* <sup>3</sup>                       | 72.3±14.0                       |
| 2) | 39.8<br>(3056/4620)* <sup>123</sup>                  | 47.7<br>(1249/1370)* <sup>23</sup>                 | 56.9<br>(911/691)* <sup>3</sup>               | 54.7 (826/683)                  |
| 3) | 78.9/15.7/5.4<br>(6048/1201/415)<br>* <sup>123</sup> | 57.7/35.2/7.1<br>(1508/921/185)<br>* <sup>23</sup> | 48.5/39.0/12.5<br>(774/622/200)* <sup>3</sup> | 28.0/47.7/24.3<br>(421/716/365) |
| 4) | 159.3±28.2* <sup>123</sup>                           | 162.7±31.7* <sup>3</sup>                           | 163.6±33.3* <sup>3</sup>                      | 167.4±42.1                      |
| 5) | 87.0±17.1* <sup>123</sup>                            | 88.0±19.0* <sup>3</sup>                            | 88.6±20.6                                     | 89.8±24.4                       |
| 6) | 67.0<br>(5085/2501)* <sup>123</sup>                  | 78.2<br>(2014/561)* <sup>23</sup>                  | 83.1<br>(1278/260)* <sup>3</sup>              | 89.2<br>(1060/128)              |
| 7) | 64.5<br>(4724/2605)* <sup>123</sup>                  | 61.0<br>(1476/942)* <sup>23</sup>                  | 59.8<br>(857/576)* <sup>3</sup>               | 59.3 (755/518)                  |
| 8) | 14.5<br>(1058/6233)* <sup>123</sup>                  | 23.3<br>(569/1870)* <sup>23</sup>                  | 28.2<br>(412/1047)* <sup>3</sup>              | 20.1<br>(254/1010)              |
| 9) | 23.6<br>(1734/5629)* <sup>123</sup>                  | 18.3<br>(449/2006)* <sup>23</sup>                  | 15.1 (220/1237)                               | 16.4<br>(209/1067)              |

\*<sup>1</sup>: significant difference between JCS0 and JCS1

1  
2  
3  
4  
5  
6  
7  
8  
9  
10  
11  
12  
13  
14  
15  
16  
17  
18  
19  
20  
21  
22  
23  
24  
25  
26  
27  
28  
29  
30  
31  
32  
33  
34  
35  
36  
37  
38  
39  
40  
41  
42  
43  
44  
45  
46  
47  
48  
49  
50  
51  
52  
53  
54  
55  
56  
57  
58  
59  
60

\*<sup>2</sup>: significant difference between JCS1 and JCS2

\*<sup>3</sup>: significant difference between JCS2 and JCS3

Data on some characteristics were missing in a few patients.

For peer review only



Table 2 Numbers of patients categorized by JCS and by ADL scale.

|              | Japan Coma Scale |      |       |       | Total |
|--------------|------------------|------|-------|-------|-------|
|              | JCS0             | JCS1 | JCS 2 | JCS 3 |       |
| <b>ADL1</b>  | 4621             | 608  | 199   | 65    | 5493  |
| <b>ADL2</b>  | 1908             | 816  | 365   | 104   | 3193  |
| <b>ADL3</b>  | 417              | 442  | 287   | 111   | 1257  |
| <b>ADL4</b>  | 146              | 276  | 325   | 296   | 1043  |
| <b>ADL5</b>  | 102              | 201  | 227   | 761   | 1291  |
| <b>Total</b> | 7194             | 2343 | 1403  | 1337  | 12277 |

We obtained data on both the JCS and the ADL scale in 12,277 (89.0%) of the stroke patients.

Table 3 Hazard ratios for death, comparing JCS categories

|       | Hazard Ratio | 95% Confidence Interval |       | p       |
|-------|--------------|-------------------------|-------|---------|
|       |              | Lower                   | Upper |         |
| JCS 0 | Reference    |                         |       | <0.001* |
| JCS 1 | 5.55         | 4.19                    | 7.37  | <0.001  |
| JCS 2 | 9.54         | 7.16                    | 12.71 | <0.001  |
| JCS 3 | 34.21        | 26.10                   | 44.83 | <0.001  |

Adjusted for age, sex, systolic and diastolic blood pressures, ~~histories~~history (hypertension, arrhythmia and diabetes mellitus), stroke type and paresis

\*-Statistical significance of consciousness levels as a whole ( $p=6.32 \times 10^{-171}$ )

STROBE 2007 (v4) Statement—Checklist of items that should be included in reports of *cohort studies*

| Section/Topic                | Item # | Recommendation                                                                                                                                                                       | Reported on page # |
|------------------------------|--------|--------------------------------------------------------------------------------------------------------------------------------------------------------------------------------------|--------------------|
| Title and abstract           | 1      | (a) Indicate the study's design with a commonly used term in the title or the abstract                                                                                               | 1                  |
|                              |        | (b) Provide in the abstract an informative and balanced summary of what was done and what was found                                                                                  | 2-4                |
| <b>Introduction</b>          |        |                                                                                                                                                                                      |                    |
| Background/rationale         | 2      | Explain the scientific background and rationale for the investigation being reported                                                                                                 | 5, 6               |
| Objectives                   | 3      | State specific objectives, including any prespecified hypotheses                                                                                                                     | 5, 6               |
| <b>Methods</b>               |        |                                                                                                                                                                                      |                    |
| Study design                 | 4      | Present key elements of study design early in the paper                                                                                                                              | 6-8                |
| Setting                      | 5      | Describe the setting, locations, and relevant dates, including periods of recruitment, exposure, follow-up, and data collection                                                      | 6-8                |
| Participants                 | 6      | (a) Give the eligibility criteria, and the sources and methods of selection of participants. Describe methods of follow-up                                                           | 6-8                |
|                              |        | (b) For matched studies, give matching criteria and number of exposed and unexposed                                                                                                  |                    |
| Variables                    | 7      | Clearly define all outcomes, exposures, predictors, potential confounders, and effect modifiers. Give diagnostic criteria, if applicable                                             | 6-8                |
| Data sources/<br>measurement | 8*     | For each variable of interest, give sources of data and details of methods of assessment (measurement). Describe comparability of assessment methods if there is more than one group | 6-8                |
| Bias                         | 9      | Describe any efforts to address potential sources of bias                                                                                                                            | 6-8                |
| Study size                   | 10     | Explain how the study size was arrived at                                                                                                                                            | 6-8                |
| Quantitative variables       | 11     | Explain how quantitative variables were handled in the analyses. If applicable, describe which groupings were chosen and why                                                         | 6-8                |
| Statistical methods          | 12     | (a) Describe all statistical methods, including those used to control for confounding                                                                                                | 7, 8               |
|                              |        | (b) Describe any methods used to examine subgroups and interactions                                                                                                                  | 7, 8               |
|                              |        | (c) Explain how missing data were addressed                                                                                                                                          | 9                  |
|                              |        | (d) If applicable, explain how loss to follow-up was addressed                                                                                                                       |                    |
|                              |        | (e) Describe any sensitivity analyses                                                                                                                                                | 7, 8               |
| <b>Results</b>               |        |                                                                                                                                                                                      |                    |

|                          |     |                                                                                                                                                                                                                                                                                                                                                                                                               |                 |
|--------------------------|-----|---------------------------------------------------------------------------------------------------------------------------------------------------------------------------------------------------------------------------------------------------------------------------------------------------------------------------------------------------------------------------------------------------------------|-----------------|
| Participants             | 13* | (a) Report numbers of individuals at each stage of study—eg numbers potentially eligible, examined for eligibility, confirmed eligible, included in the study, completing follow-up, and analysed<br>(b) Give reasons for non-participation at each stage<br>(c) Consider use of a flow diagram                                                                                                               | 9, 10           |
| Descriptive data         | 14* | (a) Give characteristics of study participants (eg demographic, clinical, social) and information on exposures and potential confounders<br>(b) Indicate number of participants with missing data for each variable of interest<br>(c) Summarise follow-up time (eg, average and total amount)                                                                                                                | 9, 10 Table 1-3 |
| Outcome data             | 15* | Report numbers of outcome events or summary measures over time                                                                                                                                                                                                                                                                                                                                                | 9, 10 Table 1-3 |
| Main results             | 16  | (a) Give unadjusted estimates and, if applicable, confounder-adjusted estimates and their precision (eg, 95% confidence interval). Make clear which confounders were adjusted for and why they were included<br>(b) Report category boundaries when continuous variables were categorized<br>(c) If relevant, consider translating estimates of relative risk into absolute risk for a meaningful time period | 9, 10 Table 1-3 |
| Other analyses           | 17  | Report other analyses done—eg analyses of subgroups and interactions, and sensitivity analyses                                                                                                                                                                                                                                                                                                                | 9, 10 Table 1-3 |
| <b>Discussion</b>        |     |                                                                                                                                                                                                                                                                                                                                                                                                               |                 |
| Key results              | 18  | Summarise key results with reference to study objectives                                                                                                                                                                                                                                                                                                                                                      | 10-14           |
| <b>Limitations</b>       |     |                                                                                                                                                                                                                                                                                                                                                                                                               |                 |
| Interpretation           | 20  | Give a cautious overall interpretation of results considering objectives, limitations, multiplicity of analyses, results from similar studies, and other relevant evidence                                                                                                                                                                                                                                    | 14-16           |
| Generalisability         | 21  | Discuss the generalisability (external validity) of the study results                                                                                                                                                                                                                                                                                                                                         | 14-16           |
| <b>Other information</b> |     |                                                                                                                                                                                                                                                                                                                                                                                                               |                 |
| Funding                  | 22  | Give the source of funding and the role of the funders for the present study and, if applicable, for the original study on which the present article is based                                                                                                                                                                                                                                                 | 1               |

\*Give information separately for cases and controls in case-control studies and, if applicable, for exposed and unexposed groups in cohort and cross-sectional studies.

**Note:** An Explanation and Elaboration article discusses each checklist item and gives methodological background and published examples of transparent reporting. The STROBE checklist is best used in conjunction with this article (freely available on the Web sites of PLoS Medicine at <http://www.plosmedicine.org/>, Annals of Internal Medicine at <http://www.annals.org/>, and Epidemiology at <http://www.epidem.com/>). Information on the STROBE Initiative is available at [www.strobe-statement.org](http://www.strobe-statement.org).





**The Eye Response Test Alone Is Sufficient To Predict Stroke Outcome: Re-Introduction of Japan Coma Scale. A cohort study**

|                                 |                                                                                                                                                                                                                                                                                                   |
|---------------------------------|---------------------------------------------------------------------------------------------------------------------------------------------------------------------------------------------------------------------------------------------------------------------------------------------------|
| Journal:                        | <i>BMJ Open</i>                                                                                                                                                                                                                                                                                   |
| Manuscript ID:                  | bmjopen-2013-002736.R1                                                                                                                                                                                                                                                                            |
| Article Type:                   | Research                                                                                                                                                                                                                                                                                          |
| Date Submitted by the Author:   | 19-Mar-2013                                                                                                                                                                                                                                                                                       |
| Complete List of Authors:       | Shigematsu, Kazuo; National Hospital Organization, Minami Kyoto Hospital, Neurology<br>Nakano, Hiromi; Kyoto Kidugawa Hospital, Neurosurgery<br>Watanabe, Yoshiyuki; Kyoto Prefectural University of Medicine, Graduate School of Medical Science, Epidemiology for Community Health and Medicine |
| <b>Primary Subject Heading</b>: | Emergency medicine                                                                                                                                                                                                                                                                                |
| Secondary Subject Heading:      | Neurology, Epidemiology, Emergency medicine, Intensive care                                                                                                                                                                                                                                       |
| Keywords:                       | Stroke < NEUROLOGY, Neurology < INTERNAL MEDICINE, Stroke medicine < INTERNAL MEDICINE                                                                                                                                                                                                            |
|                                 |                                                                                                                                                                                                                                                                                                   |

SCHOLARONE™  
Manuscripts

1  
2  
3  
4  
5 **The Eye Response Test Alone Is Sufficient To Predict Stroke Outcome:**  
6 **Re-Introduction of Japan Coma Scale. A cohort study**  
7  
8  
9

10  
11 **Short title: The Japan Coma Scale predicts stroke outcome**  
12

13  
14 Kazuo Shigematsu<sup>1</sup>, Hiromi Nakano<sup>2</sup>, Yoshiyuki Watanabe<sup>3</sup>,

15 <sup>1</sup>Department of Neurology, National Hospital Organization, Minami Kyoto Hospital,  
16 Kyoto, Japan

17 <sup>2</sup>Department of Neurosurgery, Kyoto Kidugawa Hospital, Kyoto, Japan

18 <sup>3</sup>Department of Epidemiology for Community Health and Medicine, Kyoto Prefectural  
19 University of Medicine, Graduate School of Medical Science, Kyoto, Japan  
20  
21  
22  
23

24  
25  
26 Correspondence to Kazuo Shigematsu

27 Department of Neurology, the National Hospital Organization, Minami Kyoto Hospital

28 11 Nakaashihara, Joyo, Kyoto, Japan, 610-0113

29 Phone 81-774-52-0065, Fax 81-75-821-9610, E-mail: neuron@k07.gmail.com]  
30  
31  
32

33 **Key Words:** scales; coma; consciousness; stroke  
34  
35

36 Contributorship: All authors contributed equally in the data collection and analysis. KS  
37 wrote the manuscript. All authors read and approved the final manuscript.  
38  
39

40 Conflicts of Interest: None

41 Funding: None  
42  
43  
44  
45  
46  
47  
48  
49  
50  
51  
52  
53  
54  
55  
56  
57  
58  
59  
60

## Abstract

### Objective

Prompt assessment of consciousness level is vitally important during the emergency care of stroke patients. Requirements for a better scale include simplicity, reliability, applicability and predictability for outcome. The Japan Coma Scale (JCS) is a one-axis coma scale published in 1974 with outstanding simplicity. The hypothesis is that the JCS is sufficient to predict the stroke outcome. The aim of the study is to verify the predictability of the JCS, which should help the JCS attain international recognition.

### Methods

We investigated the relationship between consciousness level based on the JCS at the stroke onset and activities of daily living (ADL) at 30 days or deaths within 30 days in a large population-based stroke registry. We calculated Spearman's correlation coefficients for the correlation between the JCS and ADL scale, generated estimated survival curves by the Kaplan-Meier method and finally compared hazard ratios for

1  
2  
3  
4  
5  
6 death within 30 days after onset, comparing patients with different conscious levels  
7  
8  
9 based on the JCS.

## 10 11 12 13 14 15 **Results**

16  
17  
18  
19  
20 A total of 13,788 (97.2%) patients were graded based on the JCS. The JCS correlated to  
21  
22  
23 ADL scores with a Spearman's correlation coefficient of 0.61. Hazard ratios for death  
24  
25  
26 within 30 days were 1 (reference), 5.55, 9.54 and 35.21 in those scored as JCS0, JCS1,  
27  
28  
29 JCS2 and JCS3, respectively.  
30  
31  
32  
33  
34

## 35 **Conclusions**

36  
37  
38  
39  
40 Using a single test of eye response, the JCS has outstanding merits as a coma scale: i.e.  
41  
42  
43 simplicity and applicability. The present study adds predictability for the early outcome  
44  
45  
46 in stroke patients. The JCS is valuable especially at an emergency setting when a  
47  
48  
49 prompt assessment of consciousness level is needed.  
50  
51  
52  
53  
54  
55  
56  
57  
58  
59  
60

## Article summary

### *Article focus*

The Japan Coma Scale (JCS) is a one-axis coma scale published in 1974. It is so simple and easy to use that it has been established as a standard coma scale in Japan. Nevertheless, it has little recognition internationally. The aim of the study is to varify its predictability in stroke patients. We hope the JCS will contribute to the medical profession and especially to the emergency medical-care.

### *Key messages*

Using a single test of eye response, the JCS has outstanding merits as a coma scale: i.e. simplicity and applicability. The present study adds predictability for the early outcome in stroke patients. The JCS is valuable especially at an emergency setting when a prompt assessment of consciousness level is needed.

### *Strengths and limitations of this study*

Strengths: the study is based on a large stroke registry and the JCS has been used widely in Japan.

Limitations: there are few studies on the JCS and on the activity daily life (ADL) scale in scientific international journals yet.

## Introduction

Prompt assessment of consciousness levels is vitally important during the emergency care of stroke patients. There is no current perfect coma scale, and requirements for a better scale include:

- 1) Simplicity: ease of assessment, ease of recording, ease of sharing with medical and co-medical staff.
- 2) Reliability: consistency among assessors.
- 3) Applicability: for any patient in any setting.
- 4) Predictability for the outcome.

The Japan Coma Scale (JCS) has become widely used in Japan since it was first published in 1974<sup>1-3</sup>. Ohta et al. launched a national survey on craniotomy for ruptured cerebral aneurysms, and described the JCS to define the consciousness level to be included in the survey, at the first meeting of the Society on Surgery for Cerebral Stroke, which was held at Miyagi, Japan (Sakunami Kanko Hotel) on May 13-14, 1972<sup>4</sup>. At that meeting, he also organized a team to evaluate the scale, because there was no standardized coma scale established in those days. The JCS was based on his study on factors affecting the prognosis of ruptured aneurysm patients after surgical interventions

1  
2  
3  
4  
5  
6<sup>5</sup>. The JCS was called the 3 group 3 grade method at first and then the “3-3-9 method”<sup>1 6</sup>,  
7  
8  
9 since the detailed version of the scale composed of four categories: alert, 1-digit code,  
10  
11 2-digit code and 3-digit code, with each digit code having three subcategories (1, 2 and  
12  
13 3 in the 1-digit code, 10, 20 and 30 in the 2-digit code, and 100, 200 and 300 in the  
14  
15 3-digit code)<sup>1</sup>. It had 10 grades in total: alert plus 9 (3 by 3) grades. This version of the  
16  
17 JCS included a motor response test in the 3-digit code patients and three special  
18  
19 conditions: restlessness, incontinence and apathy. The first full paper was accepted on  
20  
21 30 November 1973<sup>1</sup>.  
22  
23  
24  
25  
26  
27  
28

29 In this study, we applied the simple JCS without subcategories, which is  
30  
31 commonly used in Japan.  
32  
33

34  
35 An outstanding feature of the JSC is its simplicity, which has prompted both  
36  
37 pre-hospital personnel and in-hospital staff to use the scale. The JCS enables prompt  
38  
39 communication among emergency service staff and hospital staff and among nurses and  
40  
41 physicians. However, the JSC’s predictability of the outcome has not been clarified to  
42  
43 date. The lack of evidence of its predictability may have prevented the JCS from  
44  
45  
46  
47  
48  
49  
50  
51  
52  
53  
54  
55  
56  
57  
58  
59  
60  
attaining international recognition.

Our hypothesis is that consciousness levels categorized by the JCS should

1  
2  
3  
4  
5  
6 correlate with the severity of stroke and therefore should predict outcome of stroke. If  
7  
8  
9 the predictability of the JCS is demonstrated, it should be re-appraised as a prompt  
10  
11 coma scale. Although we have the Glasgow Coma Scale (GCS), which was also  
12  
13 published in 1974<sup>7,8</sup>, it would be more pragmatic to have a simpler coma scale  
14  
15 especially in an emergency. The major difference between the GCS and the JCS is that  
16  
17  
18 the former is a three-axis scale whereas the latter is a one-axis scale.  
19  
20  
21

22  
23 The aim of the study is to verify that the JCS predicts early outcome, including the level  
24  
25 of activity of daily life (ADL) and the hazard ratios for death, and, subsequently, to  
26  
27 re-introduce this simple coma scale to the world.  
28  
29  
30  
31  
32  
33  
34

### 35 **Materials and Methods**

36  
37  
38  
39  
40

41 We studied the relationship between the outcome at 30 days after stroke and the  
42  
43 consciousness levels based on the JCS at the onset of neurological impairment. We  
44  
45 analyzed all new stroke patients identified from January 1999 to December 2009  
46  
47 inclusive in the entire Kyoto prefecture and registered in the Kyoto Stroke Registry  
48  
49 (KSR)<sup>9</sup>. Detailed information on the KSR has been described previously<sup>10</sup>. The  
50  
51 diagnosis of stroke was confirmed by local neurologists and/or neurosurgeons according  
52  
53  
54  
55  
56  
57  
58  
59  
60



1  
2  
3  
4  
5  
6 to the WHO definition <sup>11</sup>. We categorized the patients into cerebral infarction (CI),  
7  
8  
9 cerebral hemorrhage (CH), subarachnoid hemorrhage (SAH) and others, based on the  
10  
11 neurological findings, laboratory data, and findings of CT, MRI and angiography.  
12  
13

14  
15  
16  
17  
18 We used the following definitions.  
19

20  
21 1) Consciousness levels based on the JCS encompassed four levels:  
22

- 23  
24 1 JCS 0 (alert)  
25  
26 2 JCS 1 (not fully alert but awake without any stimuli)  
27  
28 3 JCS 2 (arousable with stimulation)  
29  
30 4 JCS 3 (unarousable)  
31  
32  
33

34  
35 2) The ADL scale at 30 days after stroke onset included five levels:  
36

- 37  
38 1 ADL1 (No symptoms or no significant disability. Able to carry out all usual  
39  
40 activities without help. Able to walk without a mobility aide)  
41  
42  
43 2 ADL2 (mildly disabled, or utilization of mobility aide. Unable to carry out all  
44  
45 usual activities without help. Unable to walk without mobility aide.)  
46  
47  
48 3 ADL3 (moderately disabled, or wheelchair-bound condition. Unable to walk  
49  
50 without assistance.)  
51  
52  
53  
54  
55 4 ADL4 (severely disabled, or bed-bound condition. Unable to use wheel chairs  
56  
57  
58  
59  
60

1  
2  
3  
4  
5  
6 without help.)  
7  
8

9 5 ADL5 (Dead)  
10  
11  
12  
13

### 14 15 16 *Ethics Statement* 17

18  
19  
20 This research was performed in accordance with the ethical principles for medical  
21  
22 research involving human subjects outlined in the Declaration of Helsinki. This research  
23  
24 was approved by the Board of Directors, the Kyoto Medical Association, the  
25  
26 Department of Health and Welfare, Kyoto Prefecture and Ethics Committee of the  
27  
28 National Hospital Organization, Minami Kyoto Hospital. Since all identifying personal  
29  
30 information was stripped from the secondary files before analysis, the boards waived  
31  
32 the requirement for written informed consent from the patients involved.  
33  
34  
35  
36  
37  
38  
39

### 40 41 42 *Statistical Analyses* 43

44 The frequencies of characteristics among the four conscious levels were determined and  
45  
46 evaluated for univariate associations by Chi-square analysis. Numerical data such as age  
47  
48 and blood pressure were compared with Student-t test. Spearman's rank correlation  
49  
50 coefficients were used to identify the correlation between the JCS and the ADL scale.  
51  
52  
53 We used the Kaplan-Meier method for curves of estimated survival, a log-rank test for  
54  
55  
56  
57  
58  
59  
60

1  
2  
3  
4  
5  
6 comparisons of estimated survival among the JCS categories, and Cox proportional  
7  
8 hazards regression for hazard ratios for death. Adjustments for age, sex, systolic and  
9  
10 diastolic blood pressures, histories of hypertension, arrhythmia and diabetes mellitus,  
11  
12 stroke type and paresis were also utilized. Analyses were performed using SPSS ver.19.  
13  
14  
15  
16  
17  
18 All reported p values are 2-sided.  
19  
20  
21  
22

## 23 **Results**

24  
25  
26  
27  
28  
29 The characteristics of patients are summarized in Table 1. Data on age, and sex were  
30  
31 complete in all patients in the study cohort. The other characteristics had missing data in  
32  
33 a few patients. The numbers of patients examined are shown in the tables.  
34  
35  
36

37  
38 We evaluated the consciousness levels of 13,406 patients out of 13,788 (97.2%), based  
39  
40 on the JCS. JCS data were missing for 382 patients (2.8%). Among the 13,406 patients,  
41  
42 the number and percentage per group were as follows: JCS0 (7,676 [55.7%]), JCS1  
43  
44 (2,619 [9.0%]), JCS2 (1,602 [11.6%]) and JCS3 (1,509 [10.9%]), respectively. We  
45  
46  
47  
48 evaluated the ADL scale in 12,601 (91.4%) patients at 30 days after the onset of  
49  
50 neurological impairment. We obtained data on both the JCS and the ADL scale in  
51  
52  
53  
54  
55  
56  
57  
58  
59  
60  
12,277 (89.0%) of the stroke patients (Table 2).

1  
2  
3  
4  
5  
6 The Spearman's correlation coefficient was 0.608 for the correlation between the JCS  
7  
8  
9 and the ADL scale ( $p < 0.001$ ). Kaplan-Meier Survival curves of patients in each JCS  
10  
11  
12 category are presented (Figure 1). A log-rank test proved the differences were  
13  
14  
15 significant ( $p < 0.001$ ). For Kaplan-Meier Survival curves in each JCS category in each  
16  
17  
18 stroke subtype, see supplementary figures (Figure 1A, 1B and 1C).  
19  
20  
21 Hazard ratios for death, comparing JCS categories and their 95% confidential intervals,  
22  
23  
24 are summarized in Table 3.  
25  
26  
27  
28

## 29 Discussion

30  
31  
32 Systems for describing patients with impaired consciousness were not  
33  
34  
35 consistent until 1974, when the GCS and the JCS were developed<sup>7</sup>. There was an  
36  
37  
38 abundance of alternative terms by which levels of coma or impaired consciousness were  
39  
40  
41 described and recorded<sup>7</sup>. Teasdale and Jennett described that some might have  
42  
43  
44 reservations about a system which seemed to undervalue the niceties of a full  
45  
46  
47 neurological examination. Just as the GCS, it is no part of the JCS to deny the value of a  
48  
49  
50 detailed appraisal of the patients as a whole, and of neurological function in particular<sup>7</sup>.  
51

52  
53 The JCS principally focuses on eye responses. Being a single test, the JCS has  
54  
55  
56 outstanding merits as a coma scale: i.e. simplicity and applicability, which should  
57  
58  
59  
60

1  
2  
3  
4  
5  
6 minimize interpreter errors. Simplicity is very important in communication among  
7  
8  
9 physicians, nurses and paramedics, especially in emergency settings. The present study  
10  
11  
12 adds to its virtues the predictability for early outcome in stroke patients.  
13

14  
15 In summary, the advantages of the JCS include four points:  
16

17  
18 1) Predictability for stroke outcome.  
19

20  
21 This study showed the predictability of the JCS for the stroke outcome.  
22

23  
24 The JCS correlated with the ADL scale. Hazard ratios for death were significantly  
25  
26 different among JCS categories: 1.00 (as reference), 5.55, 9.54 and 34.21 in JCS0, 1, 2  
27  
28 and 3, respectively. It is noteworthy that a simple one-axis test alone predicts early  
29  
30 mortality with such clear differences. The JCS could be useful especially at an  
31  
32 emergency setting when more detailed evaluation of a patient condition is difficult to  
33  
34 obtain and prompt communications among doctors and co-medicals are needed. The  
35  
36 JCS provides minimum but critical/essential information.  
37  
38  
39  
40  
41  
42

43  
44 2) Simplicity.  
45

46  
47 The JCS is a 4-points scale (from 0 to 3) and comprises only one test: eye responses.  
48

49  
50 The Glasgow Coma Scale (GCS), for example, is a 13-points scale (from 3 to 15) and  
51  
52 comprises three tests: eye, verbal and motor responses. The JCS is similar to the eye  
53  
54 response test in the GCS but even simpler than the GCS (i.e. both E2 and E3 belong in  
55  
56  
57  
58  
59  
60

1  
2  
3  
4  
5  
6 JCS2). Being a uni-coordinate axis scale is very important for simplicity. Although  
7  
8  
9 summing up scores in a multi-coordinate axes scale may not be difficult, the scores in  
10  
11 different axes may have different values and therefore the interpretation of a total score  
12  
13 can be difficult. Hypothetically, both E3V2M1 and E2V3M1 in the GCS, for example,  
14  
15 give the same total score of 6. A same total score in a multi-coordinate axes scale could  
16  
17 reflect different underlying conditions and might be difficult to interpret. The  
18  
19 description within the JCS is also simple (e.g. JCS0, JCS1, JCS2 and JCS3), which  
20  
21 makes communication among staff easy, prompt and less misleading. It might be easier  
22  
23 to grasp the outline of a patient condition with the JCS than with any multi-axes scales.  
24  
25  
26  
27  
28  
29  
30  
31

### 32 3) Reliability.

33  
34  
35 The simplicity of the JCS might provide consistency among raters.

36  
37  
38 The four categories in the JCS are well defined. They do not overlap and they  
39  
40 encompass all consciousness levels.  
41  
42

### 43 4) Applicability.

44  
45  
46 The JCS focuses on eye response, which broadens its applicability both for raters and  
47  
48 for patients. Raters need only check eye responses in terms of three clearly  
49  
50 differentiated categories: open, open only after stimuli and closed. No special  
51  
52 knowledge, such as is needed to assess the decerebrate or decorticate response, is  
53  
54  
55  
56  
57  
58  
59  
60

1  
2  
3  
4  
5  
6 necessary. The JCS is applicable to almost all patients, including patients with aphasia,  
7  
8  
9 paresis and even in intubated patients, where it might be difficult to apply the GCS,  
10  
11  
12 because that has verbal and motor responses tests. In this population-based study, the  
13  
14  
15 JCS was applied to 13,406 out of 13,788 stroke patients (97.2%).  
16  
17  
18  
19

20  
21 There are some limitations.

22  
23 First, simplicity means lack of detail. The JCS does not evaluate verbal or  
24  
25  
26 motor responses, which are tested in the GCS. The total score in the GCS ranges from 3  
27  
28  
29 to 15 and the GCS can theoretically describe 120 (4 by 5 by 6) different conditions. The  
30  
31  
32 more tests a scale includes, the more details a scale can evaluate<sup>12 13</sup>.  
33  
34

35  
36 As far as the hazard ratios for early death and the ADL scores, however, the JCS is  
37  
38  
39 sufficient as a predictor. A single-dimensional test is the best if the purpose of the test is  
40  
41  
42 fulfilled. If needed, we can describe a patient's condition in a detailed way: such as  
43  
44  
45 decerebrate posture and decorticate posture. In the JCS, three capital letters, R, I and A,  
46  
47  
48 are provided to describe restlessness, incontinence and apathy, respectively.

49  
50 Second, consciousness levels may fluctuate even in a short period and scores may  
51  
52  
53 therefore be different from time to time. This difficulty is common to every coma scale,  
54  
55  
56 and the simplicity of the JCS might minimize it. A multi-dimensional scale might cause  
57  
58  
59  
60

1  
2  
3  
4  
5  
6 more difficulty with evaluation.  
7

8  
9 Third, predictability of the outcome has inherent limitations<sup>14</sup>. The outcomes and  
10  
11 therefore the hazard ratios for death depend not only on the baseline severity but also on  
12  
13 the treatment and patient conditions, including complications. This study did not include  
14  
15 the treatments which must affect outcomes. For precise evaluation of a relationship  
16  
17 between two factors, it should be important to adjust for all the other factors. Treatments,  
18  
19 for example, often vary from a case to case. Adjustments for them are virtually  
20  
21 impossible in a population based study. Major treatments for stroke, such as tPA therapy  
22  
23 or surgical interventions, however, should not have caused a major bias in this study,  
24  
25 because the differences in hazard ratios among the consciousness levels based on the  
26  
27 JCS remain significant after adjustment for stroke subtypes, i.e. CI, CH and SAH. The  
28  
29 JCS also predicted the outcomes in each three subtype of stroke by uni-variable  
30  
31 analyses. A tPA therapy is not applied for hemorrhagic stroke and surgical interventions  
32  
33 are rarely applied for ischemic stroke (In this study cohort, 374 (4.2%) out of 8896 CI  
34  
35 patients had surgical treatment).  
36  
37  
38  
39  
40  
41  
42  
43  
44  
45  
46  
47  
48

49 There are two types of complications: ones that patients had before stroke onset and  
50  
51 ones that they got after the onset. Although the former comprises numerous diseases,  
52  
53 risk factors such as hypertension, arrhythmia and diabetes mellitus might be important.  
54  
55  
56  
57  
58  
59  
60



1  
2  
3  
4  
5  
6 The difference in hazard ratios remained significant after adjustment for these three. The  
7  
8  
9 latter may include urinary tract infections, decubitus ulcers and pneumonia. They,  
10  
11  
12 however, occur as results of stroke, namely after the consciousness level estimation  
13  
14 based on the JCS. Although they could be related to the initial severity of the stroke,  
15  
16  
17 data on this type of complications were not available in this study.  
18  
19

20  
21 Last, we did not investigate the predictability of the JCS in light of modern  
22  
23 psychometric approach in this study. Consciousness level is a latent trait and scales  
24  
25 dedicated to its measurement should preferably undergo Rasch analysis to confirm or  
26  
27 not their metric properties. Applying Rasch analysis<sup>15 16 17</sup> would give more added-value  
28  
29  
30 to the study since it would help to investigate some aspects of the measurement  
31  
32  
33 properties of the JCS such as the appropriateness of the response format through the  
34  
35 examination of categories discrimination. The validity of the ADL scale has not been  
36  
37  
38 proved yet. Moreover, there is no study about how consistently different assessors from  
39  
40  
41 different centers used the 5-categories scale yet. This ADL scale is based on how each  
42  
43  
44 patient performed “usual activities”, which may change from a patient to another  
45  
46  
47 according to their lifestyle and environment. However, the ADL Scale is widely used in  
48  
49  
50 Japan. It is also simple scale and may have a practical value. We would like to study the  
51  
52  
53 validity, consistency among assessors and the way to elaborate the ADL scale.  
54  
55  
56  
57  
58  
59  
60

## Conclusions

The JCS is a good predictor of stroke outcome. Its two outstanding advantages, simplicity and predictability, should make the JCS re-appreciated internationally as a standard coma scale.

## Acknowledgments

We acknowledge the contribution of participating institutions and their staffs who provided data in the development of the Kyoto Stroke Registry. We thank Dr Tomio Ohta for the information on the establishment of the JCS. We are grateful to many colleagues for their assistance in this study; particularly Dr Osamu Simamura, Dr Tatsuyuki Sekimoto, Dr Kouichiro Shimizu, Dr Akihiko Nishizawa, Dr Atsushi Okumura, Dr. Masahiro Makino and Dr Kazuhiko Bando.

## References

1. Ohta T, Waga S, Handa W, et al. [New grading of level of disordered consciousness (author's transl)]. *No shinkei geka. Neurological surgery* 1974;2(9):623-7.
2. Ohta T, Kikuchi H, Hashi K, et al. Nizofenone administration in the acute stage following subarachnoid hemorrhage. Results of a multi-center controlled double-blind clinical study. *Journal of neurosurgery* 1986;64(3):420-6.
3. Shigemori M, Abe T, Aruga T, et al. Guidelines for the Management of Severe Head Injury, 2nd edition guidelines from the Guidelines Committee on the Management of Severe Head Injury, the Japan Society of Neurotraumatology. *Neurologia medico-chirurgica* 2012;52(1):1-30.
4. Ohta T SN. The research on prognosis prediction of surgical interventions for ruptured cerebral aneurysm - production of ABC index- the first report: the shortcomings of the conventional classification system of severity and determination of predicting factors of surgical prognosis. *The First Meeting of Society on Surgery for Cerebral Stroke (In Japanese)* 1972:1-20.
5. Ohta T WS, Saito I, Masugi N, et al. The survey on therapeutic strategy of cerebral aneurysm and prognosis after surgical interventions. *The Second Meeting of Society on Surgery for Cerebral Stroke (In Japanese)* 1973;2:55-75.
6. Ohta T WS, Handa H, Saito I, et al. The new grading system for disturbed consciousness and its numerical expression; the 3-3-9 degrees method. *The Third Meeting of Society on Surgery for Cerebral Stroke (In Japanese)* 1974;3:61-68.
7. Teasdale G, Jennett B. Assessment of coma and impaired consciousness. A practical scale. *Lancet* 1974;2(7872):81-4.
8. Weir CJ, Bradford AP, Lees KR. The prognostic value of the components of the Glasgow Coma Scale following acute stroke. *QJM : monthly journal of the Association of Physicians* 2003;96(1):67-74.
9. Shigematsu K, Shimamura O, Nakano H, et al. Vomiting should be a prompt predictor of stroke outcome. *Emergency medicine journal : EMJ* 10.1136/emmermed-2012-201586 (in press).
10. Shigematsu K, Nakano H, Watanabe Y, et al. Characteristics, risk factors and mortality of stroke patients in Kyoto, Japan. *BMJ open* 2013;3(3).
11. Hatano S. Experience from a multicentre stroke register: a preliminary report. *Bulletin of the World Health Organization* 1976;54(5):541-53.

- 1  
2  
3  
4  
5  
6  
7  
8  
9  
10  
11  
12  
13  
14  
15  
16  
17  
18  
19  
20  
21  
22  
23  
24  
25  
26  
27  
28  
29  
30  
31  
32  
33  
34  
35  
36  
37  
38  
39  
40  
41  
42  
43  
44  
45  
46  
47  
48  
49  
50  
51  
52  
53  
54  
55  
56  
57  
58  
59  
60
12. Lingsma HF, Roozenbeek B, Steyerberg EW, et al. Early prognosis in traumatic brain injury: from prophecies to predictions. *Lancet neurology* 2010;9(5):543-54.
  13. Wijdicks EF, Rabinstein AA, Bamlet WR, et al. FOUR score and Glasgow Coma Scale in predicting outcome of comatose patients: a pooled analysis. *Neurology* 2011;77(1):84-5.
  14. Chandra RV, Law CP, Yan B, et al. Glasgow coma scale does not predict outcome post-intra-arterial treatment for basilar artery thrombosis. *AJNR. American journal of neuroradiology* 2011;32(3):576-80.
  15. Aggestrup LM, Hestbech MS, Siersma V, et al. Psychosocial consequences of allocation to lung cancer screening: a randomised controlled trial. *BMJ open* 2012;2(2):e000663.
  16. Arnould C, Vandervelde L, Batcho CS, et al. Can manual ability be measured with a generic ABILHAND scale? A cross-sectional study conducted on six diagnostic groups. *BMJ open* 2012;2(6).
  17. Friberg P, Hagquist C, Osika W. Self-perceived psychosomatic health in Swedish children, adolescents and young adults: an internet-based survey over time. *BMJ open* 2012;2(4).

1  
2  
3  
4  
5  
6 **Legends**  
7

8 **Figure 1. Kaplan-Meier Survival curves for patients in each JCS category**  
9  
10  
11  
12  
13  
14  
15  
16  
17  
18  
19  
20  
21  
22  
23  
24  
25  
26  
27  
28  
29  
30  
31  
32  
33  
34  
35  
36  
37  
38  
39  
40  
41  
42  
43  
44  
45  
46  
47  
48  
49  
50  
51  
52  
53  
54  
55  
56  
57  
58  
59  
60

For peer review only

Table 1 The characteristics of patients in the study cohort

| Characteristic                                      |
|-----------------------------------------------------|
| 1) Age                                              |
| 2) Sex (%of female, (n=female /male))               |
| 3) Subtype (CI/CH/SAH, % (n))                       |
| 4) Systolic blood pressure                          |
| 5) Diastolic blood pressure                         |
| 6) Paresis (% , (n=with/without))                   |
| 7) Hypertension history (% , (n=with/without))      |
| 8) Arrhythmia history (% , (n=with/without))        |
| 9) Diabetes mellitus history (% , (n=with/without)) |

Table 1 Continued

|    | JCS0 (n=7676)                                        | JCS1 (n=2619)                                      | JCS2 (n=1602)                                 | JCS3 (n=1509)                   |
|----|------------------------------------------------------|----------------------------------------------------|-----------------------------------------------|---------------------------------|
| 1) | 69.7±12.3* <sup>123</sup>                            | 73.4±12.3* <sup>3</sup>                            | 73.6±14.2* <sup>3</sup>                       | 72.3±14.0                       |
| 2) | 39.8<br>(3056/4620)* <sup>123</sup>                  | 47.7<br>(1249/1370)* <sup>23</sup>                 | 56.9<br>(911/691)* <sup>3</sup>               | 54.7 (826/683)                  |
| 3) | 78.9/15.7/5.4<br>(6048/1201/415)<br>* <sup>123</sup> | 57.7/35.2/7.1<br>(1508/921/185)<br>* <sup>23</sup> | 48.5/39.0/12.5<br>(774/622/200)* <sup>3</sup> | 28.0/47.7/24.3<br>(421/716/365) |
| 4) | 159.3±28.2* <sup>123</sup>                           | 162.7±31.7* <sup>3</sup>                           | 163.6±33.3* <sup>3</sup>                      | 167.4±42.1                      |
| 5) | 87.0±17.1* <sup>123</sup>                            | 88.0±19.0* <sup>3</sup>                            | 88.6±20.6                                     | 89.8±24.4                       |
| 6) | 67.0<br>(5085/2501)* <sup>123</sup>                  | 78.2<br>(2014/561)* <sup>23</sup>                  | 83.1<br>(1278/260)* <sup>3</sup>              | 89.2<br>(1060/128)              |
| 7) | 64.5<br>(4724/2605)* <sup>123</sup>                  | 61.0<br>(1476/942)* <sup>23</sup>                  | 59.8<br>(857/576)* <sup>3</sup>               | 59.3 (755/518)                  |
| 8) | 14.5<br>(1058/6233)* <sup>123</sup>                  | 23.3<br>(569/1870)* <sup>23</sup>                  | 28.2<br>(412/1047)* <sup>3</sup>              | 20.1<br>(254/1010)              |
| 9) | 23.6<br>(1734/5629)* <sup>123</sup>                  | 18.3<br>(449/2006)* <sup>23</sup>                  | 15.1 (220/1237)                               | 16.4<br>(209/1067)              |

\*<sup>1</sup>: significant difference between JCS0 and JCS1

1  
2  
3  
4  
5  
6 \*<sup>2</sup>: significant difference between JCS1 and JCS2  
7

8  
9 \*<sup>3</sup>: significant difference between JCS2 and JCS3  
10

11 Data on some characteristics were missing in a few patients.  
12  
13  
14  
15  
16  
17  
18  
19  
20  
21  
22  
23  
24  
25  
26  
27  
28  
29  
30  
31  
32  
33  
34  
35  
36  
37  
38  
39  
40  
41  
42  
43  
44  
45  
46  
47  
48  
49  
50  
51  
52  
53  
54  
55  
56  
57  
58  
59  
60

For peer review only

Table 2 Numbers of patients categorized by JCS and by ADL scale.

|              | Japan Coma Scale |      |       |       | Total |
|--------------|------------------|------|-------|-------|-------|
|              | JCS0             | JCS1 | JCS 2 | JCS 3 |       |
| <b>ADL1</b>  | 4621             | 608  | 199   | 65    | 5493  |
| <b>ADL2</b>  | 1908             | 816  | 365   | 104   | 3193  |
| <b>ADL3</b>  | 417              | 442  | 287   | 111   | 1257  |
| <b>ADL4</b>  | 146              | 276  | 325   | 296   | 1043  |
| <b>ADL5</b>  | 102              | 201  | 227   | 761   | 1291  |
| <b>Total</b> | 7194             | 2343 | 1403  | 1337  | 12277 |

We obtained data on both the JCS and the ADL scale in 12,277 (89.0%) of the stroke patients.



Table 3 Hazard ratios for death, comparing JCS categories

|              | Hazard Ratio | 95% Confidence Interval |       | p      |
|--------------|--------------|-------------------------|-------|--------|
|              |              | Lower                   | Upper |        |
| <b>JCS 0</b> | Reference    |                         |       |        |
| <b>JCS 1</b> | 5.55         | 4.19                    | 7.37  | <0.001 |
| <b>JCS 2</b> | 9.54         | 7.16                    | 12.71 | <0.001 |
| <b>JCS 3</b> | 34.21        | 26.10                   | 44.83 | <0.001 |

Adjusted for age, sex, systolic and diastolic blood pressures, history (hypertension, arrhythmia and diabetes mellitus), stroke type and paresis

1  
2  
3  
4  
5  
6  
7  
8  
9  
10  
11  
12  
13  
14  
15  
16  
17  
18  
19  
20  
21  
22  
23  
24  
25  
26  
27  
28  
29  
30  
31  
32  
33  
34  
35  
36  
37  
38  
39  
40  
41  
42  
43  
44  
45  
46  
47  
48  
49  
50  
51  
52  
53  
54  
55  
56  
57  
58  
59  
60

Figure 1



Kaplan-Meier Survival curves for patients in each JCS category  
215x156mm (300 x 300 DPI)

view only

1  
2  
3  
4  
5  
6  
7  
8  
9  
10  
11  
12  
13  
14  
15  
16  
17  
18  
19  
20  
21  
22  
23  
24  
25  
26  
27  
28  
29  
30  
31  
32  
33  
34  
35  
36  
37  
38  
39  
40  
41  
42  
43  
44  
45  
46  
47  
48  
49  
50  
51  
52  
53  
54  
55  
56  
57  
58  
59  
60

Figure 1A-Suppl Kaplan-Meier Survival curves of patients in each JCS category  
Cerebral infarction

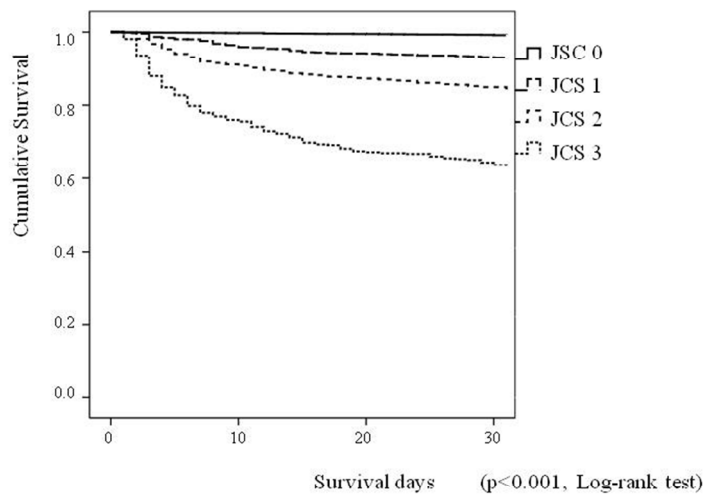

Kaplan-Meier Survival curves of patients in each JCS category  
Cerebral infarction

254x190mm (96 x 96 DPI)

1  
2  
3  
4  
5  
6  
7  
8  
9  
10  
11  
12  
13  
14  
15  
16  
17  
18  
19  
20  
21  
22  
23  
24  
25  
26  
27  
28  
29  
30  
31  
32  
33  
34  
35  
36  
37  
38  
39  
40  
41  
42  
43  
44  
45  
46  
47  
48  
49  
50  
51  
52  
53  
54  
55  
56  
57  
58  
59  
60

Figure 1B-Suppl Kaplan-Meier Survival curves of patients in each JCS category  
Cerebral hemorrhage

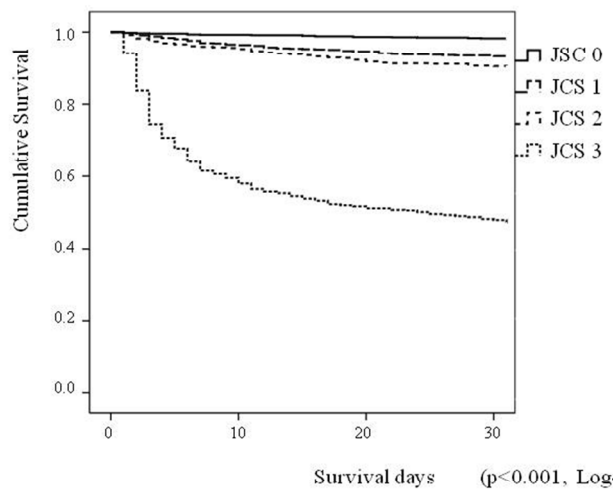

Kaplan-Meier Survival curves of patients in each JCS category  
Cerebral hemorrhage

254x190mm (96 x 96 DPI)

1  
2  
3  
4  
5  
6  
7  
8  
9  
10  
11  
12  
13  
14  
15  
16  
17  
18  
19  
20  
21  
22  
23  
24  
25  
26  
27  
28  
29  
30  
31  
32  
33  
34  
35  
36  
37  
38  
39  
40  
41  
42  
43  
44  
45  
46  
47  
48  
49  
50  
51  
52  
53  
54  
55  
56  
57  
58  
59  
60

Figure 1C-Suppl Kaplan-Meier Survival curves of patients in each JCS category Subarachnoid hemorrhage

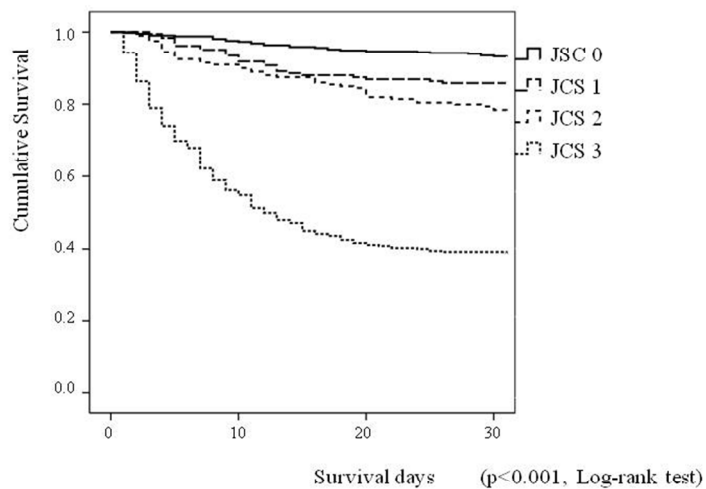

Kaplan-Meier Survival curves of patients in each JCS category Subarachnoid hemorrhage

254x190mm (96 x 96 DPI)

STROBE 2007 (v4) Statement—Checklist of items that should be included in reports of cohort studies

| Section/Topic             | Item # | Recommendation                                                                                                                                                                       | Reported on page # |
|---------------------------|--------|--------------------------------------------------------------------------------------------------------------------------------------------------------------------------------------|--------------------|
| Title and abstract        | 1      | (a) Indicate the study’s design with a commonly used term in the title or the abstract                                                                                               | 1                  |
|                           |        | (b) Provide in the abstract an informative and balanced summary of what was done and what was found                                                                                  | 2-4                |
| <b>Introduction</b>       |        |                                                                                                                                                                                      |                    |
| Background/rationale      | 2      | Explain the scientific background and rationale for the investigation being reported                                                                                                 | 5, 6               |
| Objectives                | 3      | State specific objectives, including any prespecified hypotheses                                                                                                                     | 5, 6               |
| <b>Methods</b>            |        |                                                                                                                                                                                      |                    |
| Study design              | 4      | Present key elements of study design early in the paper                                                                                                                              | 6-8                |
| Setting                   | 5      | Describe the setting, locations, and relevant dates, including periods of recruitment, exposure, follow-up, and data collection                                                      | 6-8                |
| Participants              | 6      | (a) Give the eligibility criteria, and the sources and methods of selection of participants. Describe methods of follow-up                                                           | 6-8                |
|                           |        | (b) For matched studies, give matching criteria and number of exposed and unexposed                                                                                                  |                    |
| Variables                 | 7      | Clearly define all outcomes, exposures, predictors, potential confounders, and effect modifiers. Give diagnostic criteria, if applicable                                             | 6-8                |
| Data sources/ measurement | 8*     | For each variable of interest, give sources of data and details of methods of assessment (measurement). Describe comparability of assessment methods if there is more than one group | 6-8                |
| Bias                      | 9      | Describe any efforts to address potential sources of bias                                                                                                                            | 6-8                |
| Study size                | 10     | Explain how the study size was arrived at                                                                                                                                            | 6-8                |
| Quantitative variables    | 11     | Explain how quantitative variables were handled in the analyses. If applicable, describe which groupings were chosen and why                                                         | 6-8                |
| Statistical methods       | 12     | (a) Describe all statistical methods, including those used to control for confounding                                                                                                | 7, 8               |
|                           |        | (b) Describe any methods used to examine subgroups and interactions                                                                                                                  | 7, 8               |
|                           |        | (c) Explain how missing data were addressed                                                                                                                                          | 9                  |
|                           |        | (d) If applicable, explain how loss to follow-up was addressed                                                                                                                       |                    |
|                           |        | (e) Describe any sensitivity analyses                                                                                                                                                | 7, 8               |
| <b>Results</b>            |        |                                                                                                                                                                                      |                    |

|                          |     |                                                                                                                                                                                                                                                                                                                                                                                                               |                 |
|--------------------------|-----|---------------------------------------------------------------------------------------------------------------------------------------------------------------------------------------------------------------------------------------------------------------------------------------------------------------------------------------------------------------------------------------------------------------|-----------------|
| Participants             | 13* | (a) Report numbers of individuals at each stage of study—eg numbers potentially eligible, examined for eligibility, confirmed eligible, included in the study, completing follow-up, and analysed<br>(b) Give reasons for non-participation at each stage<br>(c) Consider use of a flow diagram                                                                                                               | 9, 10           |
| Descriptive data         | 14* | (a) Give characteristics of study participants (eg demographic, clinical, social) and information on exposures and potential confounders<br>(b) Indicate number of participants with missing data for each variable of interest<br>(c) Summarise follow-up time (eg, average and total amount)                                                                                                                | 9, 10 Table 1-3 |
| Outcome data             | 15* | Report numbers of outcome events or summary measures over time                                                                                                                                                                                                                                                                                                                                                | 9, 10 Table 1-3 |
| Main results             | 16  | (a) Give unadjusted estimates and, if applicable, confounder-adjusted estimates and their precision (eg, 95% confidence interval). Make clear which confounders were adjusted for and why they were included<br>(b) Report category boundaries when continuous variables were categorized<br>(c) If relevant, consider translating estimates of relative risk into absolute risk for a meaningful time period | 9, 10 Table 1-3 |
| Other analyses           | 17  | Report other analyses done—eg analyses of subgroups and interactions, and sensitivity analyses                                                                                                                                                                                                                                                                                                                | 9, 10 Table 1-3 |
| <b>Discussion</b>        |     |                                                                                                                                                                                                                                                                                                                                                                                                               |                 |
| Key results              | 18  | Summarise key results with reference to study objectives                                                                                                                                                                                                                                                                                                                                                      | 10-14           |
| <b>Limitations</b>       |     |                                                                                                                                                                                                                                                                                                                                                                                                               |                 |
| Interpretation           | 20  | Give a cautious overall interpretation of results considering objectives, limitations, multiplicity of analyses, results from similar studies, and other relevant evidence                                                                                                                                                                                                                                    | 14-16           |
| Generalisability         | 21  | Discuss the generalisability (external validity) of the study results                                                                                                                                                                                                                                                                                                                                         | 14-16           |
| <b>Other information</b> |     |                                                                                                                                                                                                                                                                                                                                                                                                               |                 |
| Funding                  | 22  | Give the source of funding and the role of the funders for the present study and, if applicable, for the original study on which the present article is based                                                                                                                                                                                                                                                 | 1               |

\*Give information separately for cases and controls in case-control studies and, if applicable, for exposed and unexposed groups in cohort and cross-sectional studies.

**Note:** An Explanation and Elaboration article discusses each checklist item and gives methodological background and published examples of transparent reporting. The STROBE checklist is best used in conjunction with this article (freely available on the Web sites of PLoS Medicine at <http://www.plosmedicine.org/>, Annals of Internal Medicine at <http://www.annals.org/>, and Epidemiology at <http://www.epidem.com/>). Information on the STROBE Initiative is available at [www.strobe-statement.org](http://www.strobe-statement.org).

~~A simple coma scale predicts stroke outcome~~

~~The Eye Response Test Alone Is Sufficient To Predict Stroke Outcome:~~

~~Re-introductionIntroduction of the Japan Coma Scale. A cohort study~~

Formatted

Formatted

Formatted

Formatted

**Short title: The Japan Coma Scale predicts stroke outcome**

Kazuo Shigematsu<sup>1</sup>, Hiromi Nakano<sup>2</sup>, Yoshiyuki Watanabe<sup>3</sup>, ~~Tatsuyuki Sekimoto<sup>4</sup>,  
Kouichiro Shimizu<sup>5</sup>, Akihiko Nishizawa<sup>6</sup>, Atsushi Okumura<sup>7</sup>, Masahiro Makino<sup>8</sup>,  
Kazuhiko Bando<sup>9</sup>~~

Formatted: Superscript

<sup>1</sup>Department of Neurology, National Hospital Organization, Minami Kyoto Hospital, Kyoto, Japan

<sup>2</sup>Department of Neurosurgery, Kyoto Kidugawa Hospital, Kyoto, Japan

<sup>3</sup>Department of Epidemiology for Community Health and Medicine, Kyoto Prefectural University of Medicine, Graduate School of Medical Science, Kyoto, Japan

~~<sup>4</sup>Department of Neurosurgery, Kyoto Prefectural Yosanoumi Hospital, Kyoto, Japan~~

~~<sup>5</sup>Department of Neurosurgery, Kyoto Fushimi Shimizu Hospital, Kyoto, Japan~~

~~<sup>6</sup>Department of Internal Medicine, The Nishizawa Clinic, Kyoto, Japan~~

~~<sup>7</sup>Department of Neurosurgery, Jujyo Rehabilitation Hospital, Kyoto, Japan~~

~~<sup>8</sup>Department of Neurology, Japanese Red Cross Kyoto Daini Hospital, Kyoto, Japan~~

~~<sup>9</sup>Department of Internal Medicine, The Bando Clinic, Kyoto, Japan~~

Formatted: Superscript

Correspondence to Kazuo Shigematsu

Department of Neurology, the National Hospital Organization, Minami Kyoto Hospital

11 Nakaashihara, Jogyo, Kyoto, Japan, 610-0113

Phone 81-774-52-0065, Fax 81-75-821-9610, E-mail: neuron@k07.gmail.com]

**Key Words:** scales; coma; consciousness; stroke

**Contributorship:** All authors contributed equally in the data collection and analysis. KS wrote the manuscript. All authors read and approved the final manuscript.

**Conflicts of Interest:** None

**Funding:** None



1  
2  
3  
4  
5  
6  
7  
8  
9  
10  
11  
12  
13  
14  
15  
16  
17  
18  
19  
20  
21  
22  
23  
24  
25  
26  
27  
28  
29  
30  
31  
32  
33  
34  
35  
36  
37  
38  
39  
40  
41  
42  
43  
44  
45  
46  
47  
48  
49  
50  
51  
52  
53  
54  
55  
56  
57  
58  
59  
60

For peer review only



1  
2  
3  
4  
5  
6  
7  
8  
9 **Abstract**

10  
11  
12  
13  
14 **Objective**

15  
16  
17  
18  
19 Prompt assessment of consciousness level is vitally important during the emergency  
20  
21 care of stroke patients. Requirements for a better scale include simplicity, reliability,  
22  
23 applicability and predictability for outcome. The Japan Coma Scale (JCS) is a one-axis  
24  
25 coma scale published in 1974 with outstanding simplicity. The hypothesis is that the  
26  
27 JCS is sufficient to predict the stroke outcome. The aim of the study is to verify the  
28  
29 predictability of the JCS, which should help the JCS attain international recognition.  
30  
31  
32  
33  
34  
35  
36

37 **Methods**

38  
39  
40  
41  
42 We investigated the relationship between consciousness level based on the JCS at the  
43  
44 stroke onset and activities of daily living (ADL) at 30 days or deaths within 30 days in a  
45  
46 large population-based stroke registry. We calculated Spearman's correlation  
47  
48 coefficients for the correlation between the JCS and ADL scale, generated estimated  
49  
50 survival curves by the Kaplan-Meier method and finally compared hazard ratios for  
51  
52  
53  
54  
55  
56  
57  
58  
59  
60

1  
2  
3  
4  
5  
6  
7  
8  
9 death within 30 days after onset, comparing patients with different conscious levels  
10  
11 based on the JCS.  
12  
13

## 14 15 16 **Results** 17

18  
19  
20  
21 A total of 13,788 (97.2%) patients were graded based on the JCS. The JCS correlated to  
22  
23 ADL scores with a Spearman's correlation coefficient of 0.61. Hazard ratios for death  
24  
25 within 30 days were 1 (reference), 5.55, 9.54 and 35.21 in those scored as JCS0, JCS1,  
26  
27 JCS2 and JCS3, respectively.  
28  
29  
30  
31  
32  
33

## 34 35 **Conclusions** 36

37  
38  
39 Using a single test of eye response, the JCS has outstanding merits as a coma scale: i.e.  
40  
41 simplicity and applicability. The present study adds predictability for the early outcome  
42  
43 in stroke patients. The JCS is valuable especially at an emergency setting when a  
44  
45 prompt assessment of consciousness level is needed.  
46  
47  
48  
49  
50  
51  
52  
53  
54  
55  
56  
57  
58  
59  
60

1  
2  
3  
4  
5  
6  
7  
8  
9 **Article summary**

10  
11 *Article focus*

12  
13  
14 The Japan Coma Scale (JCS) is a one-axis coma scale published in 1974. It is so simple  
15  
16 and easy to use that it has been established as a standard coma scale in Japan.

17  
18  
19 Nevertheless, it has little recognition internationally. The aim of the study is to

20  
21 ~~confirm~~verify its predictability in stroke patients. We hope the JCS will contribute to  
22  
23  
24 the medical profession and especially to the emergency medical-care.

25  
26  
27 *Key messages*

28  
29 Using a single test of eye response, the JCS has outstanding merits as a coma scale: i.e.  
30  
31 simplicity and applicability. The present study adds predictability for the early outcome  
32  
33 in stroke patients. The JCS is valuable especially at an emergency setting when a  
34  
35 prompt assessment of consciousness level is needed.  
36  
37  
38

39  
40 *Strengths and limitations of this study*

41  
42 Strengths: the study is based on a large stroke registry and the JCS has been used widely  
43  
44 in Japan.

45  
46  
47 Limitations: there are few studies on the JCS and on the activity daily life (ADL) scale  
48  
49  
50 in scientific international journals yet.  
51  
52  
53  
54  
55  
56  
57  
58  
59  
60

## Introduction

Prompt assessment of consciousness levels is vitally important during the emergency care of stroke patients. There is no current perfect coma scale, and requirements for a better scale include:

- 1) Simplicity: ease of assessment, ease of recording, ease of sharing with medical and co-medical staff.
- 2) Reliability: consistency among assessors.
- 3) Applicability: for any patient in any setting.
- 4) Predictability for the outcome.

The Japan Coma Scale (JCS) has become widely used in Japan since it was first published in 1974<sup>1-3</sup>. [Ohta et al.](#) [launched a national survey on craniotomy for ruptured cerebral aneurysms, and described the JCS to define the consciousness level to be included in the survey, at the first meeting of the Society on Surgery for Cerebral Stroke, which was held at Miyagi, Japan \(Sakunami Kanko Hotel\) on May 13-14, 1972<sup>4</sup>. At that meeting, he also organized a team to evaluate the scale, because there was no standardized coma scale established in those days. The JCS was based on his study on factors affecting the prognosis of ruptured aneurysm patients after surgical interventions](#)

Formatted: Indent: First line: 0.32"

1  
2  
3  
4  
5  
6  
7  
8  
9 <sup>5</sup>. The JCS was called the 3 group 3 grade method at first and then the “3-3-9 method”<sup>1 6</sup>  
10 since the detailed version of the scale composed of four categories: alert, 1-digit code,  
11 2-digit code and 3-digit code, with each digit code having three subcategories (1, 2 and  
12 3 in the 1-digit code, 10, 20 and 30 in the 2-digit code, and 100, 200 and 300 in the  
13 3-digit code) <sup>1</sup>. It had 10 grades in total: alert plus 9 (3 by 3) grades. This version of the  
14 JCS included a motor response test in the 3-digit code patients and three special  
15 conditions: restlessness, incontinence and apathy. The first full paper was accepted on  
16 30 November 1973<sup>1</sup>.

17  
18  
19  
20  
21  
22 In this study, we applied the simple JCS without subcategories, which is  
23 commonly used in Japan.

24  
25  
26  
27  
28  
29  
30  
31  
32  
33  
34  
35 An outstanding feature of the JCS is its simplicity, which has prompted both  
36 pre-hospital personnel and in-hospital staff to use the scale. The JCS enables prompt  
37 communication among emergency service staff and hospital staff and among nurses and  
38 physicians. However, the JCS’s predictability of the outcome has not been clarified to  
39 date. The lack of evidence of its predictability may have prevented the JCS from  
40 attaining international recognition.

41  
42  
43  
44  
45  
46  
47  
48  
49  
50  
51  
52 Our hypothesis is that consciousness levels categorized by the JCS should

Formatted: Indent: First line: 0.58"

Formatted: Indent: First line: 0.58"

1  
2  
3  
4  
5  
6  
7  
8  
9 correlate with the severity of stroke and therefore should predict outcome of stroke. If

10 the predictability of the JCS is demonstrated, it should be re-appraised as a prompt

11  
12  
13 coma scale. Although we have the Glasgow Coma Scale (GCS), which was also

14  
15 published in 1974<sup>47,58</sup>, it would be more pragmatic to have a simpler coma scale

16  
17  
18 especially in an emergency. The major difference between the GCS and the JCS is that

19  
20  
21 the former is a three-axis scale whereas the latter is a one-axis scale.

22  
23  
24 The aim of the study is to ~~show~~verify that the JCS predicts early outcome, including the

25  
26  
27 level of activity of daily life (ADL) and the hazard ratios for death, and, subsequently, to

28  
29  
30 re-introduce this simple coma scale to the world.

### 31 32 33 34 **Materials and Methods**

35  
36  
37  
38  
39 We studied the relationship between the outcome at 30 days after stroke and the

40  
41  
42 consciousness levels based on the JCS at the onset of neurological impairment. We

43  
44  
45 analyzed all new stroke patients identified from January 1999 to December 2009

46  
47  
48 inclusive in the entire Kyoto prefecture and registered in the Kyoto Stroke Registry

49  
50 ~~(KSR)<sup>69</sup>. Detailed information on the KSR has been described previously~~

51  
52 ~~(Shigematsu et al. BMJ Open, in press). Detailed information on the KSR has been~~

Field Code Changed

Field Code Changed

Formatted: Indent: First line: 0.58"

Field Code Changed

Field Code Changed

1  
2  
3  
4  
5  
6  
7  
8  
9 described previously<sup>10</sup>. The diagnosis of stroke was confirmed by local neurologists  
10  
11 and/or neurosurgeons according to the WHO definition<sup>711</sup>. We categorized the patients  
12  
13 into cerebral infarction (CI), cerebral hemorrhage (CH), subarachnoid hemorrhage  
14  
15 (SAH) and others, based on the neurological findings, laboratory data, and findings of  
16  
17 CT, MRI and angiography.  
18  
19  
20  
21  
22  
23

24 We used the following definitions.

25  
26  
27 1) Consciousness levels based on the JCS encompassed four levels:

- 28 1 JCS 0 (alert)
- 29 2 JCS 1 (not fully alert but awake without any stimuli)
- 30 3 JCS 2 (arousable with stimulation)
- 31 4 JSC 3 (unarousable)

32  
33  
34  
35  
36  
37  
38  
39 2) The ADL scale at 30 days after stroke onset included five levels:

- 40 1 ADL1 (No symptoms or no significant disability. Able to carry out all usual  
41 activities without help. Able to walk without a mobility aide)
- 42 2 ADL2 (mildly disabled, or utilization of mobility aide. Unable to carry out all  
43 usual activities without help. Unable to walk without mobility aide.)
- 44 3 ADL3 (moderately disabled, or wheelchair-bound condition. Unable to walk  
45  
46  
47  
48  
49  
50  
51  
52  
53  
54  
55  
56  
57  
58  
59  
60

Field Code Changed

Field Code Changed



1  
2  
3  
4  
5  
6  
7  
8  
9 without assistance.)

10  
11 4 ADL4 (severely disabled, or bed-bound condition. Unable to use wheel chairs

12  
13 without help.)

14  
15  
16  
17 5 ADL5 (Dead)

18  
19  
20  
21  
22  
23 ***Ethics Statement***

24  
25  
26 This research was performed in accordance with the ethical principles for medical  
27  
28 research involving human subjects outlined in the Declaration of Helsinki. This research  
29  
30 was approved by the Board of Directors, the Kyoto Medical Association, the  
31  
32 Department of Health and Welfare, Kyoto Prefecture and Ethics Committee of the  
33  
34 National Hospital Organization, Minami Kyoto Hospital. Since all identifying personal  
35  
36 information was stripped from the secondary files before analysis, the boards waived  
37  
38 the requirement for written informed consent from the patients involved.  
39  
40  
41  
42  
43  
44

45  
46 ***Statistical Analyses***

47  
48 The frequencies of characteristics among the four conscious levels were determined and  
49  
50 evaluated for univariate associations by Chi-square analysis. Numerical data such as age  
51  
52 and blood pressure were compared with Student-t test. Spearman's rank correlation  
53  
54  
55  
56  
57  
58  
59  
60

1  
2  
3  
4  
5  
6  
7  
8  
9 coefficients were used to identify the correlation between the JCS and the ADL scale.

10  
11 We used the Kaplan-Meier method for curves of estimated survival, a log-rank test for  
12  
13 comparisons of estimated survival among the JCS categories, and Cox proportional  
14  
15 hazards regression for hazard ratios for death. Adjustments for age, sex, systolic and  
16  
17 diastolic blood pressures, histories of hypertension, arrhythmia and diabetes mellitus,  
18  
19 stroke type and paresis were also utilized. Analyses were performed using SPSS ver.19.  
20  
21  
22  
23

24 All reported p values are 2-sided.  
25  
26  
27

## 28 29 **Results**

30  
31  
32  
33  
34 The characteristics of patients are summarized in Table 1. Data on age, and sex were  
35  
36 complete in all patients in the study cohort. The other characteristics had missing data in  
37  
38 a few patients. The numbers of patients examined are shown in the tables.  
39  
40  
41

42 We evaluated the consciousness levels of 13,406 patients out of 13,788 (97.2%), based  
43  
44 on the JCS. JCS data were missionmissing for 382 patients (2.8%). Among the 13,406  
45  
46 patients, the number and percentage per group were as follows: JCS0 (7,676 [55.7%]),  
47  
48 JCS1 (2,619 [9.0%]), JCS2 (1,602 [11.6%]) and JCS3 (1,509 [10.9%]), respectively. We  
49  
50 evaluated the ADL scale in 12,601 (91.4%) patients at 30 days after the onset of  
51  
52  
53  
54  
55  
56  
57  
58  
59  
60

1  
2  
3  
4  
5  
6  
7  
8  
9 neurological impairment. We obtained data on both the JCS and the ADL scale in  
10  
11 12,277 (89.0%) of the stroke patients (Table 2).

12  
13  
14 The Spearman's correlation coefficient was 0.608 for the correlation between the JCS  
15  
16 and the ADL scale ( $p < 0.001$ ). Kaplan-Meier Survival curves of patients in each JCS  
17  
18 category are presented (Figure 1). A log-rank test proved the differences were  
19  
20 significant ( $p < 0.001$ ). For Kaplan-Meier Survival curves in each JCS category in each  
21  
22 stroke subtype, see supplementary figures (Figure 1A, 1B and 1C).

23  
24  
25 Hazard ratios for death, comparing JCS categories and their 95% confidential intervals,  
26  
27 are summarized in Table 3.  
28  
29  
30  
31  
32  
33

### 34 Discussion

35  
36  
37  
38  
39 Systems for describing patients with impaired consciousness were not  
40  
41 consistent until 1974, when the GCS and the JCS were developed<sup>7</sup>. There was an  
42  
43 abundance of alternative terms by which levels of coma or impaired consciousness were  
44  
45 described and recorded<sup>7</sup>. Teasdale and Jennett described that some might have  
46  
47 reservations about a system which seemed to undervalue the niceties of a full  
48  
49 neurological examination. Just as the GCS, it is no part of the JCS to deny the value of a  
50  
51  
52  
53  
54  
55  
56  
57  
58  
59  
60

1  
2  
3  
4  
5  
6  
7  
8  
9 detailed appraisal of the patients as a whole, and of neurological function in particular<sup>7</sup>.

10  
11 The JCS principally focuses on eye responses. Being a single test, the JCS has  
12  
13  
14 outstanding merits as a coma scale: i.e. simplicity and applicability, which should  
15  
16 minimize interpreter errors. Simplicity is very important in communication among  
17  
18 physicians, nurses and paramedics, especially in emergency settings. The present study  
19  
20 adds to its virtues the predictability for early outcome in stroke patients.  
21  
22

23  
24 In summary, the advantages of the JCS include four points:

25  
26 1) Predictability for stroke outcome.

27  
28 This study showed the predictability of the JCS for the stroke outcome.

29  
30 The JCS correlated with the ADL scale. Hazard ratios for death were significantly  
31  
32 different among JCS categories: 1.00 (as reference), 5.55, 9.54 and 34.21 in JCS0, 1, 2  
33  
34 and 3, respectively. It is noteworthy that a simple one-axis test alone predicts early  
35  
36 mortality with such clear differences. The JCS could be useful especially at an  
37  
38 emergency setting when more detailed evaluation of a patient condition is difficult to  
39  
40 obtain and prompt communications among doctors and co-medicals are needed. The  
41  
42 JCS provides minimum but critical/essential information.  
43  
44  
45  
46  
47  
48

49  
50 2) Simplicity.

51  
52 The JCS is a 4-points scale (from 0 to 3) and comprises only one test: eye responses.  
53  
54  
55  
56  
57  
58  
59  
60

Formatted: Indent: First line: 0.58"

1  
2  
3  
4  
5  
6  
7  
8  
9 The Glasgow ~~coma scale~~ Coma Scale (GCS), for example, is a 13-points scale (from 3  
10 to 15) and comprises three tests: eye, verbal and motor responses. The JCS is similar to  
11 the eye response test in the GCS but even simpler than the GCS (i.e. both E2 and E3  
12 belong in JCS2). Being a uni-coordinate axis scale is very important for simplicity.  
13

14 Although summing up scores in a multi-coordinate axes scale may not be difficult, the  
15 scores in different axes may have different values and therefore the interpretation of a  
16 total score can be difficult. Hypothetically, both E3V2M1 and E2V3M1 in the GCS, for  
17 example, give the same total score of 6. A same total score in a multi-coordinate axes  
18 scale could reflect different underlying conditions and might be difficult to interpret.  
19

20 The description within the JCS is also simple (e.g. ~~JCS~~, JCS0, JCS1, JCS2 and JCS3),  
21 which makes communication among staff easy, prompt and less misleading. It ~~is~~  
22 ~~much~~ might be easier to grasp the outline of a patient condition with the JCS than with  
23 any multi-axes scales.  
24

### 25 3) Reliability.

26 The simplicity of the JCS ~~provides~~ might provide consistency among raters.  
27

28 The four categories in the JCS are well defined. They do not overlap and they  
29 encompass all consciousness levels.  
30

### 31 4) Applicability.

32  
33  
34  
35  
36  
37  
38  
39  
40  
41  
42  
43  
44  
45  
46  
47  
48  
49  
50  
51  
52  
53  
54  
55  
56  
57  
58  
59  
60

1  
2  
3  
4  
5  
6  
7  
8  
9 The JCS focuses on eye response, which broadens its applicability both for raters and  
10  
11 for patients. Raters need only check eye responses in terms of three clearly  
12  
13 differentiated categories: open, open only after stimuli and closed. No special  
14  
15 knowledge, such as is needed to assess the decerebrate or decorticate response, is  
16  
17 necessary. The JCS is applicable to almost all patients, including patients with aphasia,  
18  
19 paresis and even in intubated patients, where it might be difficult to apply the GCS,  
20  
21 because that has verbal and motor responses tests. In this population-based study, the  
22  
23 JCS was applied to 13,406 out of 13,788 stroke patients (97.2%).  
24  
25  
26  
27  
28  
29  
30  
31

### *Historical information on the JCS*

32  
33  
34  
35  
36  
37 ~~Ohta et al. launched a national survey on craniotomy for ruptured cerebral aneurysms,~~  
38  
39 ~~and described the JCS to define the consciousness level to be included in the survey, at~~  
40  
41 ~~the first meeting of the Society on Surgery for Cerebral Stroke, which was held at~~  
42  
43 ~~Miyagi, Japan (Sakunami Kanko Hotel) on May 13-14, 1972<sup>8</sup>. At that meeting, he also~~  
44  
45 ~~organized a team to evaluate the scale, because there was no standardized coma scale~~  
46  
47 ~~established in those days. The JCS was based on his study on factors affecting the~~  
48  
49 ~~prognosis of ruptured aneurysm patients after surgical interventions<sup>9</sup>. The JCS was~~  
50  
51  
52  
53  
54  
55  
56  
57  
58  
59  
60

called the 3 group 3 grade method at first and then the “3-3-9 method”<sup>11,10</sup>, since the detailed version of the scale composed of four categories: alert, 1-digit code, 2-digit code and 3-digit code, with each digit code having three subcategories (1, 2 and 3 in the 1-digit code, 10, 20 and 30 in the 2-digit code, and 100, 200 and 300 in the 3-digit code)<sup>†</sup>. It had 10 grades in total: alert plus 9 (3 by 3) grades. This version of the JCS included a motor response test in the 3-digit code patients and three special conditions: restlessness, incontinence and apathy. The first full paper was accepted on 30 November 1973 and published in 1974. There are some limitations.

First, simplicity<sup>†</sup>. In this study, we applied the simple JCS without subcategories, which is commonly used in Japan.

### ***Limitations & Responses***

†) **-Simplicity** means lack of detail. The JCS does not evaluate verbal or motor responses, which are tested in the GCS. The total score in the GCS ranges from 3 to 15 and the GCS can theoretically describe 120 (4 by 5 by 6) different conditions. The more tests a scale includes, the more details a scale can evaluate<sup>11,12,13</sup>.

***Response:-***

Formatted: Indent: First line: 0.58"

Formatted: Indent: First line: 0.58", No bullets or numbering

1  
2  
3  
4  
5  
6  
7  
8  
9 As far as the hazard ratios for early death and the ADL scores, however, the JCS is  
10 sufficient as a predictor. A single-dimensional test is the best if the purpose of the test is  
11 fulfilled. If needed, we can describe a patient's condition in a detailed way: such as  
12  
13  
14  
15  
16  
17  
18  
19  
20  
21  
22  
23  
24  
25  
26  
27  
28  
29  
30  
31  
32  
33  
34  
35  
36  
37  
38  
39  
40  
41  
42  
43  
44  
45  
46  
47  
48  
49  
50  
51  
52  
53  
54  
55  
56  
57  
58  
59  
60

decrebrate posture and decorticate posture. In the JCS, three capital letters, R, I and A,  
are provided to describe restlessness, incontinence and apathy, respectively. —

Formatted: Indent: Left: 0"

—  
2) ~~Consciousness~~ Second, consciousness levels may fluctuate even in a short  
period and scores may therefore be different from time to time. — This difficulty is  
common to every coma scale, and the simplicity of the JCS might minimize it. A  
multi-dimensional scale might cause more difficulty with evaluation.

Formatted: Indent: First line: 0.25", No bullets or numbering

**Response:**

~~This difficulty is common to every coma scale, and the simplicity of the JCS  
minimizes it. A multi-dimensional scale might cause more difficulty with evaluation~~

3) ~~Predictability~~ Third, predictability of the outcome has inherent limitations.<sup>13,14</sup> The

Field Code Changed

outcomes and therefore the hazard ratios for death depend not only on the baseline  
severity but also on the treatment and patient conditions, including complications.

This study did not include the treatments which must affect outcomes.



***Response:***

For precise evaluation of a relationship between two factors, it should be important to adjust for all the other factors. Treatments, for example, often vary from a case to case. Adjustments for them are virtually impossible in a population based study. Major treatments for stroke, such as tPA therapy or surgical interventions, however, should not have caused a major bias in this study, because the differences in hazard ratios among the consciousness levels based on the JCS remain significant after adjustment for stroke subtypes, i.e. CI, CH and SAH. The JCS also predicted the outcomes in each three subtype of stroke by uni-variable analyses. A tPA therapy is not applied for hemorrhagic stroke and surgical interventions are rarely applied for ischemic stroke (In this study cohort, 374 (4.2%) out of 8896 CI patients had surgical treatment).

There are two types of complications: ones that patients had before stroke onset and ones that they got after the onset. Although the former comprises numerous diseases, risk factors such as hypertension, arrhythmia and diabetes mellitus might be important. The difference in hazard ratios remained significant after adjustment for these three. The latter may include urinary tract infections, decubitus ulcers and pneumonia. They, however, occur as results of stroke, namely after the consciousness level estimation based on the JCS. Although they could be related to the initial severity of the stroke,

Formatted: Indent: Left: 0", First line: 0.25"

1  
2  
3  
4  
5  
6  
7  
8  
9 data on this type of complications were not available in this study.

10  
11 Last, we did not investigate the predictability of the JCS in light of modern  
12 psychometric approach in this study. Consciousness level is a latent trait and scales  
13 dedicated to its measurement should preferably undergo Rasch analysis to confirm or  
14 not their metric properties. Applying Rasch analysis<sup>15 16 17</sup> would give more added-value  
15 to the study since it would help to investigate some aspects of the measurement  
16 properties of the JCS such as the appropriateness of the response format through the  
17 examination of categories discrimination. The validity of the ADL scale has not been  
18 proved yet. Moreover, there is no study about how consistently different assessors from  
19 different centers used the 5-categories scale yet. This ADL scale is based on how each  
20 patient performed “usual activities”, which may change from a patient to another  
21 according to their lifestyle and environment. However, the ADL Scale is widely used in  
22 Japan. It is also simple scale and may have a practical value. We would like to study the  
23 validity, consistency among assessors and the way to elaborate the ADL scale.  
24  
25  
26  
27  
28  
29  
30  
31  
32  
33  
34  
35  
36  
37  
38  
39  
40  
41  
42  
43  
44

## 45 46 47 **Conclusions**

48  
49  
50  
51  
52 The ~~Japan Coma Scale~~JCS is a good predictor of stroke outcome. Its two  
53  
54  
55  
56  
57  
58  
59  
60

Formatted: Indent: First line: 0.58"

1  
2  
3  
4  
5  
6  
7  
8  
9 outstanding advantages, simplicity and predictability, should make the JCS  
10  
11 re-appreciated internationally as a standard coma scale.  
12  
13

### 14 Acknowledgments

15  
16  
17  
18 We acknowledge the contribution of participating institutions and their staffs  
19 who provided data in the development of the Kyoto Stroke Registry. We thank Dr  
20 Tomio Ohta for the information on the establishment of the JCS. We are grateful to  
21 many colleagues for their assistance in this study; particularly Dr Osamu Simamura, Dr  
22 Tatsuyuki Sekimoto, Dr Kouichiro Shimizu, Dr Akihiko Nishizawa, Dr Atsushi  
23 Okumura, Dr Masahiro Makino and Dr Kazuhiko Bando.  
24  
25  
26  
27  
28  
29  
30  
31  
32  
33  
34  
35  
36  
37  
38  
39  
40  
41  
42  
43  
44  
45  
46  
47  
48  
49  
50  
51  
52  
53  
54  
55  
56  
57  
58  
59  
60

Formatted: Justified, Indent: First line: 0.58", Line spacing: single, Adjust space between Latin and Asian text, Adjust space between Asian text and numbers

Formatted: Font: Century, 10.5 pt

## References

1. Ohta T, Waga S, Handa W, Saito I, Takeuchi K. [New grading of level of disordered consciousness (author's transl)]. *No shinkei geka. Neurological surgery* 1974;2(9):623-7.
2. Ohta T, Kikuchi H, Hashi K, Kudo Y. Nizofenone administration in the acute stage following subarachnoid hemorrhage. Results of a multi-center controlled double-blind clinical study. *Journal of neurosurgery* 1986;64(3):420-6.
3. Shigemori M, Abe T, Aruga T, Ogawa T, Okudera H, Ono J, et al. Guidelines for the Management of Severe Head Injury, 2nd edition guidelines from the Guidelines Committee on the Management of Severe Head Injury, the Japan Society of Neurotraumatology. *Neurologia medico-chirurgica* 2012;52(1):1-30.
4. ~~Teasdale G, Jennett B. Assessment of coma and impaired consciousness. A practical scale. *Lancet* 1974;2(7872):81-4.~~
5. ~~Weir CJ, Bradford AP, Lees KR. The prognostic value of the components of the Glasgow Coma Scale following acute stroke. *QJM: monthly journal of the Association of Physicians* 2003;96(1):67-74.~~
6. ~~Shigematsu K, Shimamura O, Nakano H, Watanabe Y, Sekimoto T, Shimizu K, et al. Vomiting should be a prompt predictor of stroke outcome. *Emergency medicine journal: EMJ* 2012.~~
7. ~~Hatano S. Experience from a multicentre stroke register: a preliminary report. *Bulletin of the World Health Organization* 1976;54(5):541-53.~~
8. Ohta T SN. The research on prognosis prediction of surgical interventions for ruptured cerebral aneurysm - production of ABC index- the first report: the shortcomings of the conventional classification system of severity and determination of predicting factors of surgical prognosis. *The First Meeting of Society on Surgery for Cerebral Stroke (In Japanese)* 1972:1-20.
95. Ohta T WS, Saito I, Masugi N, Suzuki J, Takaku A. The survey on therapeutic strategy of cerebral aneurysm and prognosis after surgical interventions. *The Second Meeting of Society on Surgery for Cerebral Stroke (In Japanese)* 1973;2:55-75.
106. Ohta T WS, Handa H, Saito I, Takeuchi K, Masugi N, Suzuki J, Takaku A. The new grading system for disturbed consciousness and its numerical expression; the 3-3-9 degrees method. *The Third Meeting of Society on Surgery for Cerebral Stroke (In Japanese)* 1974;3:61-68.

- 1  
2  
3  
4  
5  
6  
7  
8  
9  
10  
11  
12  
13  
14  
15  
16  
17  
18  
19  
20  
21  
22  
23  
24  
25  
26  
27  
28  
29  
30  
31  
32  
33  
34  
35  
36  
37  
38  
39  
40  
41  
42  
43  
44  
45  
46  
47  
48  
49  
50  
51  
52  
53  
54  
55  
56  
57  
58  
59  
60
- ~~4~~7. Teasdale G, Jennett B. Assessment of coma and impaired consciousness. A practical scale. *Lancet* 1974;2(7872):81-4.
8. Weir CJ, Bradford AP, Lees KR. The prognostic value of the components of the Glasgow Coma Scale following acute stroke. *QJM : monthly journal of the Association of Physicians* 2003;96(1):67-74.
9. Shigematsu K, Shimamura O, Nakano H, Watanabe Y, Sekimoto T, Shimizu K, et al. Vomiting should be a prompt predictor of stroke outcome. *Emergency medicine journal : EMJ* 10.1136/emmermed-2012-201586 (in press).
10. Shigematsu K, Nakano H, Watanabe Y, Sekimoto T, Shimizu K, Nishizawa A, et al. Characteristics, risk factors and mortality of stroke patients in Kyoto, Japan. *BMJ open* 2013;3(3).
11. Hatano S. Experience from a multicentre stroke register: a preliminary report. *Bulletin of the World Health Organization* 1976;54(5):541-53.
12. Lingsma HF, Roozenbeek B, Steyerberg EW, Murray GD, Maas AI. Early prognosis in traumatic brain injury: from prophecies to predictions. *Lancet neurology* 2010;9(5):543-54.
- ~~4~~13. Wijdicks EF, Rabinstein AA, Bamlet WR, Mandrekar JN. FOUR score and Glasgow Coma Scale in predicting outcome of comatose patients: a pooled analysis. *Neurology* 2011;77(1):84-5.
- ~~4~~14. Chandra RV, Law CP, Yan B, Dowling RJ, Mitchell PJ. Glasgow coma scale does not predict outcome post-intra-arterial treatment for basilar artery thrombosis. *AJNR. American journal of neuroradiology* 2011;32(3):576-80.
15. Aggestrup LM, Hestbech MS, Siersma V, Pedersen JH, Brodersen J. Psychosocial consequences of allocation to lung cancer screening: a randomised controlled trial. *BMJ open* 2012;2(2):e000663.
16. Arnould C, Vandervelde L, Batcho CS, Penta M, Thonnard JL. Can manual ability be measured with a generic ABILHAND scale? A cross-sectional study conducted on six diagnostic groups. *BMJ open* 2012;2(6).
17. Friberg P, Hagquist C, Osika W. Self-perceived psychosomatic health in Swedish children, adolescents and young adults: an internet-based survey over time. *BMJ open* 2012;2(4).

1  
2  
3  
4  
5  
6  
7  
8  
9  
10  
11  
12  
13  
14  
15  
16  
17  
18  
19  
20  
21  
22  
23  
24  
25  
26  
27  
28  
29  
30  
31  
32  
33  
34  
35  
36  
37  
38  
39  
40  
41  
42  
43  
44  
45  
46  
47  
48  
49  
50  
51  
52  
53  
54  
55  
56  
57  
58  
59  
60

**Legends**

**Figure 1. Kaplan-Meier Survival curves for patients in each JCS category**

For peer review only

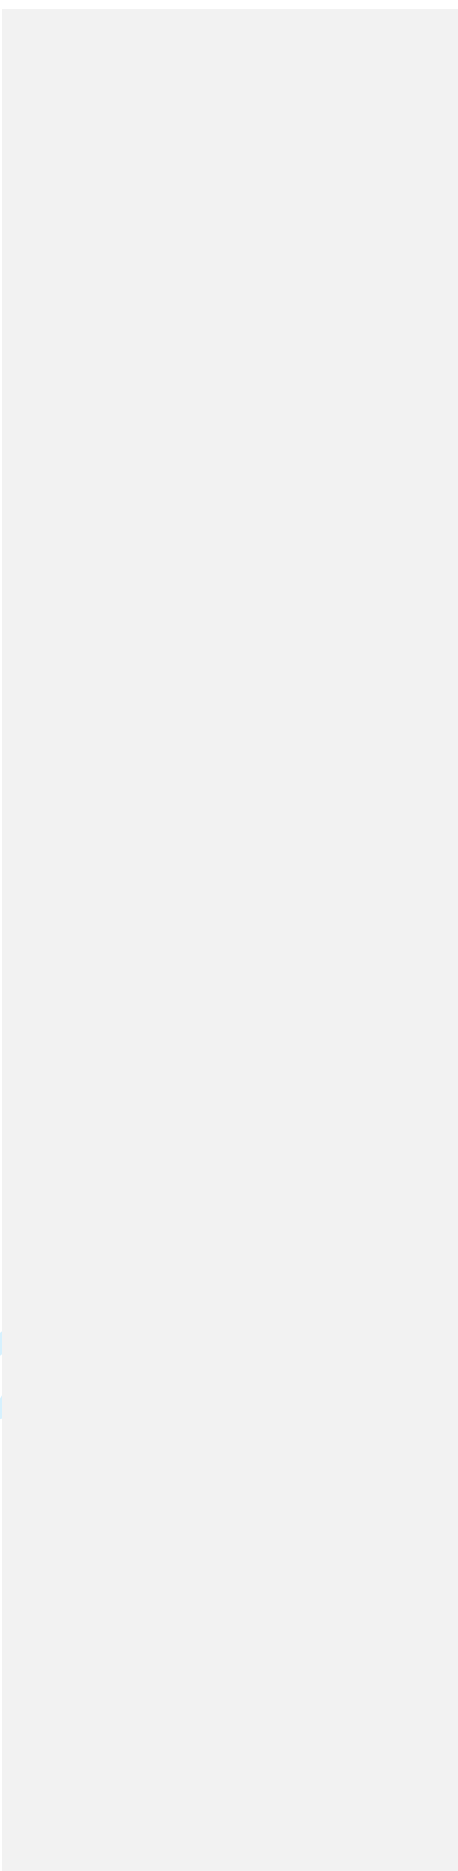

Table 1 The characteristics of patients in the study cohort

| <b>Characteristic</b> |                                                         |  |  |  |
|-----------------------|---------------------------------------------------------|--|--|--|
| 1)                    | <b>Age</b>                                              |  |  |  |
| 2)                    | <b>Sex (%of female, (n=female /male))</b>               |  |  |  |
| 3)                    | <b>Subtype (CI/CH/SAH, % (n))</b>                       |  |  |  |
| 4)                    | <b>Systolic blood pressure</b>                          |  |  |  |
| 5)                    | <b>Diastolic blood pressure</b>                         |  |  |  |
| 6)                    | <b>Paresis (% , (n=with/without))</b>                   |  |  |  |
| 7)                    | <b>Hypertension history (% , (n=with/without))</b>      |  |  |  |
| 8)                    | <b>Arrhythmia history (% , (n=with/without))</b>        |  |  |  |
| 9)                    | <b>Diabetes mellitus history (% , (n=with/without))</b> |  |  |  |

  

| Table 1 Continued |                             |                            |                             |                      |
|-------------------|-----------------------------|----------------------------|-----------------------------|----------------------|
|                   | <b>JCS0 (n=7676)</b>        | <b>JCS1 (n=2619)</b>       | <b>JCS2 (n=1602)</b>        | <b>JCS3 (n=1509)</b> |
| 1)                | 69.7±12.3* <sup>123</sup>   | 73.4±12.3* <sup>3</sup>    | 73.6±14.2* <sup>3</sup>     | 72.3±14.0            |
| 2)                | 39.8                        | 47.7                       | 56.9                        | 54.7 (826/683)       |
| 3)                | (3056/4620)* <sup>123</sup> | (1249/1370)* <sup>23</sup> | (911/691)* <sup>3</sup>     |                      |
|                   | 78.9/15.7/5.4               | 57.7/35.2/7.1              | 48.5/39.0/12.5              | 28.0/47.7/24.3       |
|                   | (6048/1201/415)             | (1508/921/185)             | (774/622/200)* <sup>3</sup> | (421/716/365)        |
|                   | * <sup>123</sup>            | * <sup>23</sup>            |                             |                      |
| 4)                | 159.3±28.2* <sup>123</sup>  | 162.7±31.7* <sup>3</sup>   | 163.6±33.3* <sup>3</sup>    | 167.4±42.1           |
| 5)                | 87.0±17.1* <sup>123</sup>   | 88.0±19.0* <sup>3</sup>    | 88.6±20.6                   | 89.8±24.4            |
| 6)                | 67.0                        | 78.2                       | 83.1                        | 89.2                 |
|                   | (5085/2501)* <sup>123</sup> | (2014/561)* <sup>23</sup>  | (1278/260)* <sup>3</sup>    | (1060/128)           |
| 7)                | 64.5                        | 61.0                       | 59.8                        | 59.3 (755/518)       |
|                   | (4724/2605)* <sup>123</sup> | (1476/942)* <sup>23</sup>  | (857/576)* <sup>3</sup>     |                      |
| 8)                | 14.5                        | 23.3                       | 28.2                        | 20.1                 |
|                   | (1058/6233)* <sup>123</sup> | (569/1870)* <sup>23</sup>  | (412/1047)* <sup>3</sup>    | (254/1010)           |
| 9)                | 23.6                        | 18.3                       | 15.1 (220/1237)             | 16.4                 |
|                   | (1734/5629)* <sup>123</sup> | (449/2006)* <sup>23</sup>  |                             | (209/1067)           |

\*<sup>1</sup>: significant difference between JCS0 and JCS1

1  
2  
3  
4  
5  
6  
7  
8  
9  
10  
11  
12  
13  
14  
15  
16  
17  
18  
19  
20  
21  
22  
23  
24  
25  
26  
27  
28  
29  
30  
31  
32  
33  
34  
35  
36  
37  
38  
39  
40  
41  
42  
43  
44  
45  
46  
47  
48  
49  
50  
51  
52  
53  
54  
55  
56  
57  
58  
59  
60

\*<sup>2</sup>: significant difference between JCS1 and JCS2

\*<sup>3</sup>: significant difference between JCS2 and JCS3

Data on some characteristics were missing in a few patients.

For peer review only



Table 2 Numbers of patients categorized by JCS and by ADL scale.

|              | Japan Coma Scale |      |       |       | Total |
|--------------|------------------|------|-------|-------|-------|
|              | JCS0             | JCS1 | JCS 2 | JCS 3 |       |
| <b>ADL1</b>  | 4621             | 608  | 199   | 65    | 5493  |
| <b>ADL2</b>  | 1908             | 816  | 365   | 104   | 3193  |
| <b>ADL3</b>  | 417              | 442  | 287   | 111   | 1257  |
| <b>ADL4</b>  | 146              | 276  | 325   | 296   | 1043  |
| <b>ADL5</b>  | 102              | 201  | 227   | 761   | 1291  |
| <b>Total</b> | 7194             | 2343 | 1403  | 1337  | 12277 |

We obtained data on both the JCS and the ADL scale in 12,277 (89.0%) of the stroke patients.

Table 3 Hazard ratios for death, comparing JCS categories

|              | Hazard Ratio | 95% Confidence Interval |       | p      |
|--------------|--------------|-------------------------|-------|--------|
|              |              | Lower                   | Upper |        |
| <b>JCS 0</b> | Reference    |                         |       |        |
| <b>JCS 1</b> | 5.55         | 4.19                    | 7.37  | <0.001 |
| <b>JCS 2</b> | 9.54         | 7.16                    | 12.71 | <0.001 |
| <b>JCS 3</b> | 34.21        | 26.10                   | 44.83 | <0.001 |

Adjusted for age, sex, systolic and diastolic blood pressures, history (hypertension, arrhythmia and diabetes mellitus), stroke type and paresis
