# Supplementary material for: The eye response test alone is sufficient to predict stroke outcome—reintroduction of Japan Coma Scale: a cohort study
Source: HighWire-hosted journal article supplement (doi:10.1136/bmjopen-2013-002736), 2013-01-01

Figure 1A-Suppl Kaplan-Meier Survival curves of patients in each JCS category  
Cerebral infarction

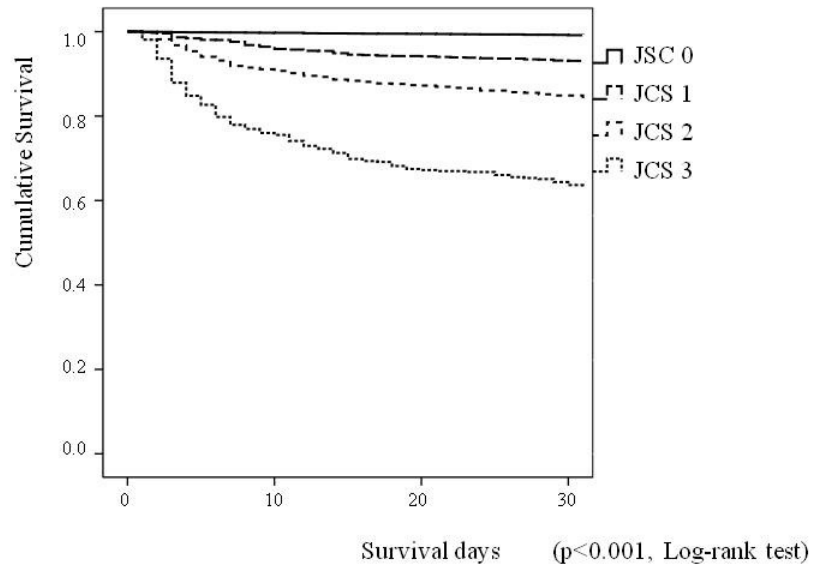

Figure 1B-Suppl Kaplan-Meier Survival curves of patients in each JCS category  
Cerebral hemorrhage

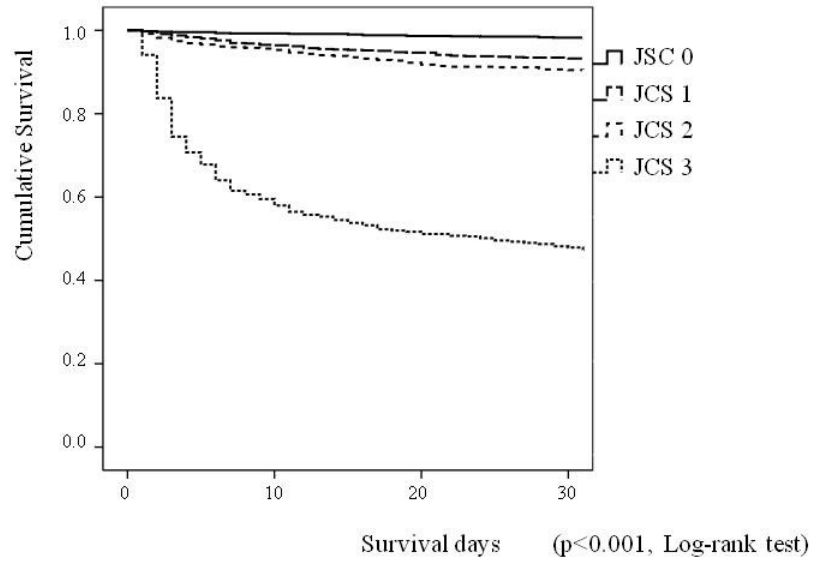

Figure 1C-Suppl Kaplan-Meier Survival curves of patients in each JCS category  
Subarachnoid hemorrhage

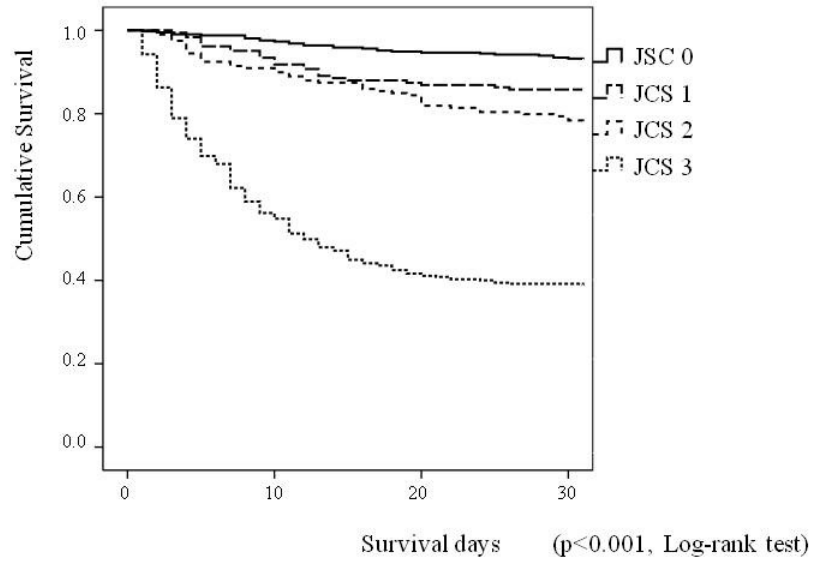

Supplement: bmjopen-2013-002736supp_figure.pdf [file bmjopen-2013-002736supp_figure.pdf]
